# Supplementary material
Source: PubMed Central journal article supplement (PMC5097938)
Supplement: mmc11.pdf [file mmc11.pdf]

# Allele-Specific Methylome and Transcriptome Analysis Reveals Widespread Imprinting in the Human Placenta

Hiroataka Hamada,<sup>1,6</sup> Hiroaki Okae,<sup>1,6,\*</sup> Hidehiro Toh,<sup>2</sup> Hatsune Chiba,<sup>1</sup> Hitoshi Hiura,<sup>1</sup> Kenjiro Shirane,<sup>2</sup> Tetsuya Sato,<sup>3</sup> Mikita Suyama,<sup>3</sup> Nobuo Yaegashi,<sup>4,5</sup> Hiroyuki Sasaki,<sup>2</sup> and Takahiro Arima<sup>1,\*</sup>

DNA methylation is globally reprogrammed after fertilization, and as a result, the parental genomes have similar DNA-methylation profiles after implantation except at the germline differentially methylated regions (gDMRs). We and others have previously shown that human blastocysts might contain thousands of transient maternally methylated gDMRs (transient mDMRs), whose maternal methylation is lost in embryonic tissues after implantation. In this study, we performed genome-wide allelic DNA methylation analyses of purified trophoblast cells from human placentas and, surprisingly, found that more than one-quarter of the transient-in-embryo mDMRs maintained their maternally biased DNA methylation. RNA-sequencing-based allelic expression analyses revealed that some of the placenta-specific mDMRs were associated with expression of imprinted genes (e.g., *TIGAR*, *SLC4A7*, *PROSER2-AS1*, and *KLHDC10*), and three imprinted gene clusters were identified. This approach also identified some X-linked gDMRs. Comparisons of the data with those from other mammals revealed that genomic imprinting in the placenta is highly variable. These findings highlight the incomplete erasure of germline DNA methylation in the human placenta; understanding this erasure is important for understanding normal placental development and the pathogenesis of developmental disorders with imprinting effects.

## Introduction

Mammalian gametes have unique DNA-methylation profiles, different from those of somatic cells. The DNA-methylation patterns acquired during gametogenesis are predominantly erased by demethylation after fertilization, followed by de novo methylation at implantation.<sup>1–3</sup> Consequently, the parental genomes have similar DNA-methylation profiles after implantation except at the germline differentially methylated regions (gDMRs). gDMRs are characterized by parent-of-origin-dependent, allele-specific DNA methylation initiated in the gametes and maintained after fertilization. Canonical gDMRs regulate the strict parent-of-origin-dependent, allele-specific expression of imprinted genes in *cis*.<sup>4,5</sup> Currently, about 80 and 25 gDMRs have been identified in the human and mouse, respectively.<sup>6–9</sup>

Recently, we and others reported genome-wide DNA-methylation analyses of human gametes and early embryos.<sup>10–12</sup> These data show that regions hypermethylated in oocytes and hypomethylated in sperm (oocyte-specific methylated regions) maintained levels of methylation very similar to those of the known gDMRs in human blastocysts. Most of these oocyte-specific methylated regions become hyper- or hypo-methylated in the embryonic lineage after implantation. These data demonstrated that many oocyte-specific methylated regions

were transiently maintained as gDMRs during human preimplantation development but were lost in the embryonic lineage.

Regulation of DNA methylation in the extraembryonic lineage differs from that of the embryonic lineages. For example, the placenta has lower methylation levels than embryonic tissues,<sup>13</sup> and partially methylated domains cover ~40% of the genome in the human placenta.<sup>14,15</sup> In addition, more than half of the known human gDMRs are maintained in a placenta-specific manner.<sup>7–9</sup> Aberrant DNA methylation, including abnormal imprinting, in the human placenta is associated with various developmental disorders, including miscarriage, preeclampsia, intrauterine growth restriction (IUGR), and imprinting disorders such as hydatidiform mole, Beckwith-Wiedemann syndrome (MIM: 130650), and Silver-Russell syndrome (MIM: 180860).<sup>16–20</sup> In spite of the potential clinical importance of these epigenetic alterations, there is insufficient information on how germline DNA methylation is reprogrammed and how the unique methylation profile is established and maintained in the human placenta.

In this study, we performed genome-wide allelic DNA methylation analyses and transcriptome-wide allelic expression analyses. We identified hundreds of gDMRs in the human placenta, and some of these were confirmed to be associated with imprinted gene expression.

<sup>1</sup>Department of Informative Genetics, Environment and Genome Research Center, Tohoku University Graduate School of Medicine, Sendai 980-8575, Japan; <sup>2</sup>Division of Epigenomics and Development, Medical Institute of Bioregulation, Kyushu University, Fukuoka 812-8582, Japan; <sup>3</sup>Division of Bioinformatics, Medical Institute of Bioregulation, Kyushu University, Maidashi 3-1-1, Higashi-ku, Fukuoka 812-8582, Japan; <sup>4</sup>Department of Obstetrics, Tohoku University Graduate School of Medicine, Sendai 980-8575, Japan; <sup>5</sup>Department of Gynecology, Tohoku University Graduate School of Medicine, Sendai 980-8575, Japan

<sup>6</sup>These authors contributed equally to this work

\*Correspondence: okaehiro@m.tohoku.ac.jp (H.O.), tarima@med.tohoku.ac.jp (T.A.)

<http://dx.doi.org/10.1016/j.ajhg.2016.08.021>

© 2016 American Society of Human Genetics.

## Material and Methods

### Sample Collection

Human placentas and peripheral blood were obtained from healthy women who had provided signed informed consent, and approval of the Ethics Committee of Tohoku University School of Medicine was obtained (research licenses 2012-1-538 and 2015-1-219). First- (5–11 weeks' gestation,  $n = 23$ ) and second (21 weeks' gestation,  $n = 1$ )-trimester placentas were obtained from elective termination of pregnancies with live fetuses. Term placentas ( $n = 2$ ) were obtained after elective caesarean section.

### Isolation of Cytotrophoblast cells

Cytotrophoblast (CT) cells were isolated from fresh placental tissues as described previously<sup>21</sup> but with some modifications. In brief, for first-trimester placentas, whole placental villi were cut into small pieces, washed several times in 0.9% NaCl, and enzymatically digested in a solution containing equal amounts of TrypLE (Life Technologies) and Accumax (Innovative Cell Tech). Single-cell suspensions were prepared with a 70  $\mu\text{m}$  mesh filter, and CT cells were immunomagnetically purified with the EasySep PE selection kit (StemCell Technologies) and PE-conjugated anti-CD49f antibody (clone GoH3, Miltenyi Biotec). CD49f is a specific surface marker of CT cells,<sup>22</sup> and >90% of the purified CT cells were positive for both CD49f and CK7 (clone SP52, Abnova Corporation), a pan-trophoblast marker. The cell purity was assessed by flow cytometry (FACSARIA II, BD Bioscience). Thy1 (CD90)-positive stromal cells were also isolated from first-trimester placentas in a similar way to CT cells except for the use of anti-Thy1 antibody (clone DG3, Miltenyi Biotec) instead of anti-CD49f antibody.

For second-trimester and term placentas, about 50 g placental villous tissue was cut into small pieces and washed with 0.9% NaCl until the supernatant was clear. The washed tissue was enzymatically digested as described above. Single-cell suspensions were prepared by filtration, and red blood cells and cell debris were removed via Percoll density gradient (10%–70%; GE Healthcare Life Sciences) centrifugation. After removal of CD45-positive leukocytes with the EasySep Human CD45 Depletion Kit (StemCell Technologies), CD49f-positive CT cells were immunomagnetically purified as described above.

### Whole-Genome Bisulfite Sequencing

Whole-genome bisulfite sequencing (WGBS) was performed via the paired-end post-bisulfite adaptor-tagging (PBAT) method.<sup>23,24</sup> In brief, genomic DNA (100–300 ng) was purified with phenol and chloroform extraction and ethanol precipitation. Genomic DNA spiked with 0.5% (w/w) unmethylated lambda phage DNA (Promega) was used for library preparation according to the PBAT protocol. Concentrations of the PBAT products were quantified with the KAPA Library Quantification Kit for Illumina platforms (Kapa Biosystems). PBAT libraries were sequenced on the Illumina HiSeq 1500 platform (HCS v2.0.5, RTA v1.17.20; Illumina, CA, USA) with 101 bp paired-end reads. After the first four bases and the last base were trimmed, the paired-end reads were aligned to the reference genome (UCSC hg19) with Bismark (v.0.9.0) under default parameters.<sup>25</sup> The Y chromosome was excluded from the reference genome. After the paired-end alignment, unmapped reads were further aligned as single-end reads. The methylation level of each cytosine was calculated with the Bismark methylation extractor (the option “no overlap” was used for paired-end reads). For each cytosine-phosphate-guanine (CpG) site, combining reads from

both strands allowed calculation of the methylation level. Methylation levels of CpGs covered with  $\geq 5$  reads were analyzed.

### Targeted Bisulfite Sequencing

Genomic DNA (~1  $\mu\text{g}$ ) was sheared into 400 bp fragments with Covaris M220 (Covaris, Woburn, MA). The fragments were end repaired and A-tailed by the NEBNext Ultra End Repair/dA-Tailing Module (NEB, Ipswich, MA) and ligated to custom sequencing adapters using the NEBNext Ultra Ligation Module (NEB). The sequencing adapters were a mixture of two cytosine-methylated adapters (Adaptor-T and Adaptor-C) in equal amounts. Adaptor-T with a 3'-T overhang was prepared by annealing (5'-CTA CAC GAC GCT CTT CCG ATC TT-3') and (5'-AGA TCG GAA GAG CAC ACG TCT GAA-3'; 5' phosphorylated). Adaptor-C with a 3'-C overhang was prepared by annealing (5'-CTA CAC GAC GCT CTT CCG ATC TC-3') and (5'-AGA TCG GAA GAG CAC ACG TCT GAA-3'; 5' phosphorylated). Adaptor-C was added to increase the ligation efficiency because both A- and G-tailing take place by the dA-tailing. Target regions (candidate mDMRs ( $n = 1,594$ ), candidate pDMRs ( $n = 187$ ) and known gDMRs ( $n = 76$ )) were enriched using the SureSelect Custom Target Enrichment kit (Agilent Technologies, Santa Clara, CA). The enriched fragments were treated with sodium bisulfite using the EZ DNA Methylation-Lightning Kit (Zymo Research, Orange, CA) and amplified for 10 cycles using the KAPA HiFi HotStart Uracil+ ReadyMix PCR Kit (KAPA Biosystems, Boston, MA). The libraries were sequenced on the Illumina HiSeq 2500 platform (Illumina) with 101-bp single-end or paired-end reads. For the single-end reads, the first 2 and last 1 bases were trimmed. For the paired end reads, the first 2 and last 1 bases were trimmed from the forward reads and the first 5 and last 1 bases were trimmed from the reverse reads. The trimmed reads were aligned to the reference genome with Bismark using default parameters. For female samples, the Y chromosome was excluded from the reference genome. The mean percentage of off-target sequences was 82.6% (standard deviation (SD): 1.4). The percentages of off-target sequences were relatively high because repeat sequences were not excluded from the targeted regions. The mean percentage of the targeted regions covered with at least 10 reads was 73.5% (SD: 2.4). The methylation level of each cytosine was calculated using the Bismark methylation extractor. For each CpG, reads from both strands were combined to calculate the methylation level. Methylation levels of CpGs covered with  $\geq 5$  reads were analyzed.

### WGS and SNP Calling

To identify SNPs distinguishing parental alleles, WGS was performed with CT samples and the mother's peripheral blood cells. Genomic DNA was purified with phenol and chloroform extraction and ethanol precipitation, and WGS libraries were constructed with the TruSeq Nano DNA LT Sample Prep Kit (Illumina) according to the manufacturer's instructions. Libraries were sequenced on the Illumina HiSeq 2500 platform (Illumina) with 101 bp paired-end reads. The reads were aligned to the reference genome with Bowtie2 (v.2.1.0) under default parameters.<sup>26</sup> The Y chromosome was excluded from the reference genome.

Only uniquely mapped reads were kept, and identical reads were treated as a single read to remove PCR duplicates. Overlapping paired-end reads were clipped by clipOverlap from BamUtil (v.1.0.12). SNPs were called with UnifiedGenotyper from GenomeAnalysisTK (v.3.3-0).<sup>27</sup> For each SNP covered with  $\geq 20$  reads, the numbers of reads containing the reference allele

([read\_ref]) and reads containing the major variant allele ([read\_var]) were counted. The proportion of reads containing the reference allele ([proportion\_ref]) was then calculated as follows:  $[\text{proportion\_ref}] = [\text{read\_ref}] / ([\text{read\_ref}] + [\text{read\_var}])$ . We used only SNPs with  $0.65 > [\text{proportion\_ref}] > 0.35$  in a CT sample and with  $[\text{proportion\_ref}] > 0.99$  or  $< 0.01$  in the mother's peripheral blood cells to distinguish parental alleles. To estimate maternal cell contamination, we used SNPs with  $[\text{proportion\_ref}] > 0.95$  or  $< 0.05$  in a CT sample and with  $0.65 > [\text{proportion\_ref}] > 0.35$  in the mother's peripheral blood cells.

### Exome Sequencing and SNP Calling

To identify SNPs distinguishing parental alleles, we performed exome sequencing with CT samples and the mother's peripheral blood cells. Exome-sequencing libraries were constructed with the SureSelect Human All Exon V5+UTRs Kit (Agilent Technologies) according to the manufacturer's instructions. For samples analyzed by targeted bisulfite sequencing, the SureSelect Custom Target Enrichment library described above was mixed with the SureSelect Human All Exon V5+UTRs library at a 1:4 ratio. Libraries were sequenced on the Illumina HiSeq 2500 platform (Illumina) with 101 bp paired-end reads. The reads were aligned to the reference genome, and SNPs were called as described above.

### Allelic DNA-Methylation Analysis

Single-end and paired-end reads containing SNPs were extracted from the uniquely mapped reads obtained by the WGBS and targeted bisulfite sequencing analyses. C>T SNPs were not considered for reads aligned to the top strand, and G>A SNPs were not considered for reads aligned to the bottom strand. The reads were classified into maternal and paternal reads according to the SNP alleles (reads containing both maternal and paternal alleles were discarded). The methylation level of each cytosine was calculated from the maternal and paternal reads separately. For each CpG site, we combined reads from both strands to calculate the methylation level. For allelic methylation analyses, we used only methylation levels of CpGs that were covered with  $\geq 5$  reads for both maternal and paternal alleles and that were not overlapping SNPs. Only regions or windows containing  $\geq 5$  informative CpGs were analyzed. In cases where there were two or more SNPs in a region or window, we considered all the maternal and paternal reads overlapping these SNPs when we calculated the allelic methylation levels.

For windows, the statistical significance of the methylation differences between parental alleles was assessed with a Student's *t* test with BH's False Discovery Rate (FDR) correction. For candidate gDMRs, we combined the data from first-trimester CT (1<sup>st</sup>-CT) or We also combined data from second-trimester and term CT (2<sup>nd</sup>/term-CT) samples and calculated the mean maternal and paternal methylation levels for each CpG site. Then, the BH-corrected *p* value was determined for each candidate gDMR as described above. BH-corrected  $p < 0.05$  was considered statistically significant.

### RNA Sequencing and Allelic Expression Analysis

Total RNA was extracted with the RNeasy Mini Kit and RNase-free DNase (QIAGEN, CA, USA) and used for library construction with the TruSeq Stranded mRNA LT Sample Prep Kit (Illumina) according to the manufacturer's protocol. RNA integrity was assessed via TapeStation 2200 (Agilent Technologies), and all samples had a RNA Integrity Number Equivalent (RIN<sup>e</sup>) value of  $>8.0$ . The libraries were sequenced on the Illumina HiSeq 2500 platform (Illumina) with 101 bp paired-end reads. The reads were aligned to the

reference genome with TopHat (v.2.0.13)<sup>28</sup> and the Refseq gene annotation. For female samples, the Y chromosome was excluded from the reference genome. Expression levels (FPKM) of Refseq genes were calculated with Cufflinks (v. 2.2.1).<sup>28</sup> For allelic expression analyses, only uniquely mapped reads were kept, and overlapping paired-end reads were clipped by clipOverlap. We analyzed only SNPs covered with  $\geq 20$  reads, and the numbers of paternal and maternal reads were counted for each gene. To identify candidate imprinted genes, we combined the data from 1<sup>st</sup>-CT or 2<sup>nd</sup>/term-CT samples and summed the numbers of paternal and maternal reads for each gene. The allelic expression differences were then analyzed via the binomial test with BH correction. BH-corrected  $p < 0.05$  was considered statistically significant. We defined genes showing  $<35\%$  mean [M-expression] ratios and statistically significant allelic expression differences as paternally expressed and those showing  $>65\%$  as maternally expressed according to the criteria applied in a previous study.<sup>29</sup>

### Conventional Bisulfite Sequencing

We treated DNA samples with sodium bisulfite by using the EZ DNA Methylation-Gold Kit (Zymo Research) and amplified them by performing PCR with the TaKaRa EpiTaq HS (Takara Bio). The PCR products were cloned into the pGEM-T Easy vector (Promega), and individual clones were sequenced. The following primers were used: the *LOC389906*-ds DMR (5'-TTA ATG GGG TAA AGG GG TTA GA-3' and 5'-ACC AAA TAA ACC CCA CCC AAA C-3') and the *NUDT10* (MIM: 300527) DMR (5'-TTT TGT AAG GTG GGA ATT TGT TGA-3' and 5'-CTC CTA AAA CCA AAA ACC TCC T-3').

### Annotations of Genomic Regions

Annotation of Refseq genes was downloaded from the UCSC Genome Browser. Promoters were defined as regions 1 kb upstream and downstream of transcription start sites of Refseq transcripts. The gene bodies were defined as transcribed regions of Refseq transcripts except for promoters. When several Refseq transcripts were assigned to a Refseq gene, the transcribed regions were merged into a single gene body. Promoters and gene bodies of Refseq genes shorter than 300 bp (these genes encoded microRNAs or small nucleolar RNAs in most cases) were excluded from our analyses. Regions and names of the 80 known gDMRs were defined as previously reported.<sup>7–10</sup> Among 101 mDMRs identified by Hanna et al.,<sup>9</sup> only mDMRs whose maternal methylation was confirmed in normal placental samples are included in the known gDMRs. The list of known imprinted genes was obtained from the Catalogue of Parental Origin Effects database and a previous study.<sup>8</sup> GO analyses were performed with the Database for Annotation, Visualization, and Integrated Discovery (DAVID).<sup>30</sup>

### External Data

The WGBS data of human oocytes, sperm, blastocysts, and cord blood cells were from our previous study.<sup>10</sup> We also included available WGBS data of human H9 ES cells (GEO: GSM706059),<sup>31</sup> a term placenta analyzed without a cell purification step (GSM1134682),<sup>7</sup> mouse oocytes (DDBJ Sequence Read Archive (DRA) accession number: DRA000570),<sup>32</sup> sperm, blastocysts (DRA: DRA000484)<sup>33</sup> and placenta (GEO: GSM1051161).<sup>13</sup>

### Graphical Presentation

Methylation levels of CpGs were visualized with Integrative Genomics Viewer (IGV) software.<sup>34</sup> Violin plots were generated with the

vioplot package. The bee swarm plots were generated with the beeswarm package in R.

## Results

### Global DNA-Methylation Patterns of Parental Genomes

The chorionic villi of the first-trimester placenta are mainly composed of cytotrophoblast (CT) and syncytiotrophoblast (ST) cells but also contain non-trophoblastic cell types, including stromal cells and maternal immune cells.<sup>35</sup> ST cells are formed by fusion of many CT cells and are difficult to isolate. In this study, CT cells were immunomagnetically enriched and used for the analysis.

We performed whole-genome bisulfite sequencing (WGBS) of CT cells isolated from one first-trimester placenta (sample ID: 1<sup>st</sup>-CT #6 (♀); see [Table S1](#)) at high coverage (an average of 41 reads per CpG site). We compared the methylation profile of the CT cells with those of human gametes, blastocysts, cord blood cells,<sup>10</sup> and ES cells.<sup>31</sup> We used a system of sliding windows of 20 CpGs with a step size change of 10 CpGs to characterize global DNA-methylation changes as described previously.<sup>10</sup> The mean length of the 20 CpG windows was 2.0 kb, and windows of more than 10 kb were excluded from the analysis. We focused on windows hypermethylated ( $\geq 80\%$ ) or hypomethylated ( $\leq 20\%$ ) in one or both gametes ([Figure 1A](#)). Windows hypermethylated in oocytes and hypomethylated in sperm (oocyte-specific methylated windows) maintained intermediate methylation levels in blastocysts (median = 35.1%). An intermediate pattern was also apparent in CT cells (median = 58.0%) ([Figure 1A](#)). Therefore, we inferred that some oocyte-specific methylated regions might maintain maternal allele-specific DNA methylation in CT cells. In contrast, sperm-specific methylated windows were nearly completely demethylated in blastocysts (median = 9.5%) ([Figure 1A](#)), suggesting the loss of paternal allele-specific DNA methylation after fertilization.

To identify single-nucleotide polymorphisms (SNPs) that would allow the analysis of DNA methylation on the two parental alleles, we performed whole-genome sequencing (WGS) of the CT cells (1<sup>st</sup>-CT #6) and the mother's peripheral blood cells. We successfully analyzed the allelic DNA-methylation patterns of 75,391 windows (~3% of all windows) ([Figure 1B](#)). The mean length of these windows was 1.2 kb, and the mean number of informative CpGs per window was 7.7. Consistent with the global methylation changes, the maternal alleles of oocyte-specific methylated regions had higher methylation levels than the paternal alleles ([Figure 1C](#)). We defined maternally or paternally methylated windows as those showing  $\geq 30\%$  or  $\leq -30\%$  [M – P] level (the maternal methylation level minus the paternal methylation level) and statistically significant allelic methylation differences (Benjamini-Hochberg (BH)-corrected  $p < 0.05$ , Student's t test). We found that 28.9% of

oocyte-specific methylated windows showed maternal methylation, whereas only 0.2% of them showed paternal methylation ([Figure 1C](#)). For the other types of windows, the parental alleles had similar methylation levels ([Figure 1C](#)). To confirm these findings, we further performed WGBS of an additional CT sample (sample ID: 1<sup>st</sup>-CT #9 (♀)) at relatively low coverage (an average of 20 reads per CpG site). In this sample, 27.5% of oocyte-specific methylated windows showed maternal methylation, and the allelic methylation levels were strongly correlated between 1<sup>st</sup>-CT #6 and 1<sup>st</sup>-CT #9 (Pearson's  $r > 0.9$ ) ([Figure S1](#)). Therefore, more than one-quarter of oocyte-specific methylated windows might maintain parent-of-origin-dependent maternal DNA methylation in CT cells.

### Identification of gDMRs

To analyze allelic DNA methylation in more placental samples, we focused on oocyte- and sperm-specific methylated windows showing methylation patterns similar to those of known gDMRs (25%–65% methylation in blastocysts and 30%–70% methylation in CT cells). After merging these windows, we obtained 3,676 candidate mDMRs and 1,229 candidate pDMRs except for known gDMRs ([Table S2](#)). We selected 1,594 candidate mDMRs and 187 candidate pDMRs containing at least two windows for further analyses ([Figure S2A](#)). These candidate gDMRs were enriched, treated with bisulfite, and analyzed by high-throughput sequencing (targeted bisulfite sequencing). Among 80 known gDMRs identified in previous reports,<sup>7–10</sup> 76 gDMRs also met the criteria described above. These 76 gDMRs were also included in the targeted bisulfite sequencing analyses ([Table S2](#)).

We analyzed allelic DNA methylation of candidate gDMRs in CT samples obtained from eight 1<sup>st</sup>-CT, one 2<sup>nd</sup>-CT, and two term-CT placentas ([Figure S3](#)). In all, 797 and 449 candidate mDMRs were successfully analyzed for 1<sup>st</sup>-CT and 2<sup>nd</sup>/term-CT samples, respectively ([Tables S3](#) and [S4](#)). Allelic DNA-methylation patterns of 42 and 32 known gDMRs were also obtained for 1<sup>st</sup>-CT and 2<sup>nd</sup>/term-CT samples, respectively ([Tables S5](#) and [S6](#)). Most known gDMRs were confirmed to show  $\geq 30\%$  or  $\leq -30\%$  [M – P] levels. We defined candidate mDMRs or pDMRs showing  $\geq 30\%$  or  $\leq -30\%$  mean [M – P] levels and statistically significant allelic methylation differences (BH-corrected  $p < 0.05$ , Student's t test) as confirmed gDMRs. These cutoff criteria for confirmed gDMRs are more stringent than those applied in a previous study<sup>9</sup> ([Figure S2B](#)). In total, 48.1% (383/797) and 33.2% (149/449) of the candidate mDMRs were confirmed to be mDMRs in 1<sup>st</sup>-CT and 2<sup>nd</sup>/term-CT samples, respectively ([Figure 2A](#) and [Figure S4A](#)). In all, the allelic methylation was successfully analyzed for 904 regions, of which 440 were confirmed to be mDMRs in 1<sup>st</sup>-CT and/or 2<sup>nd</sup>/term-CT samples. Among the 440 confirmed mDMRs, 439 mDMRs contained two or more CpGs with [M – P]  $\geq 30\%$ . Although one mDMR had only one CpG with [M – P]  $\geq 30\%$ , the other CpGs within this mDMR



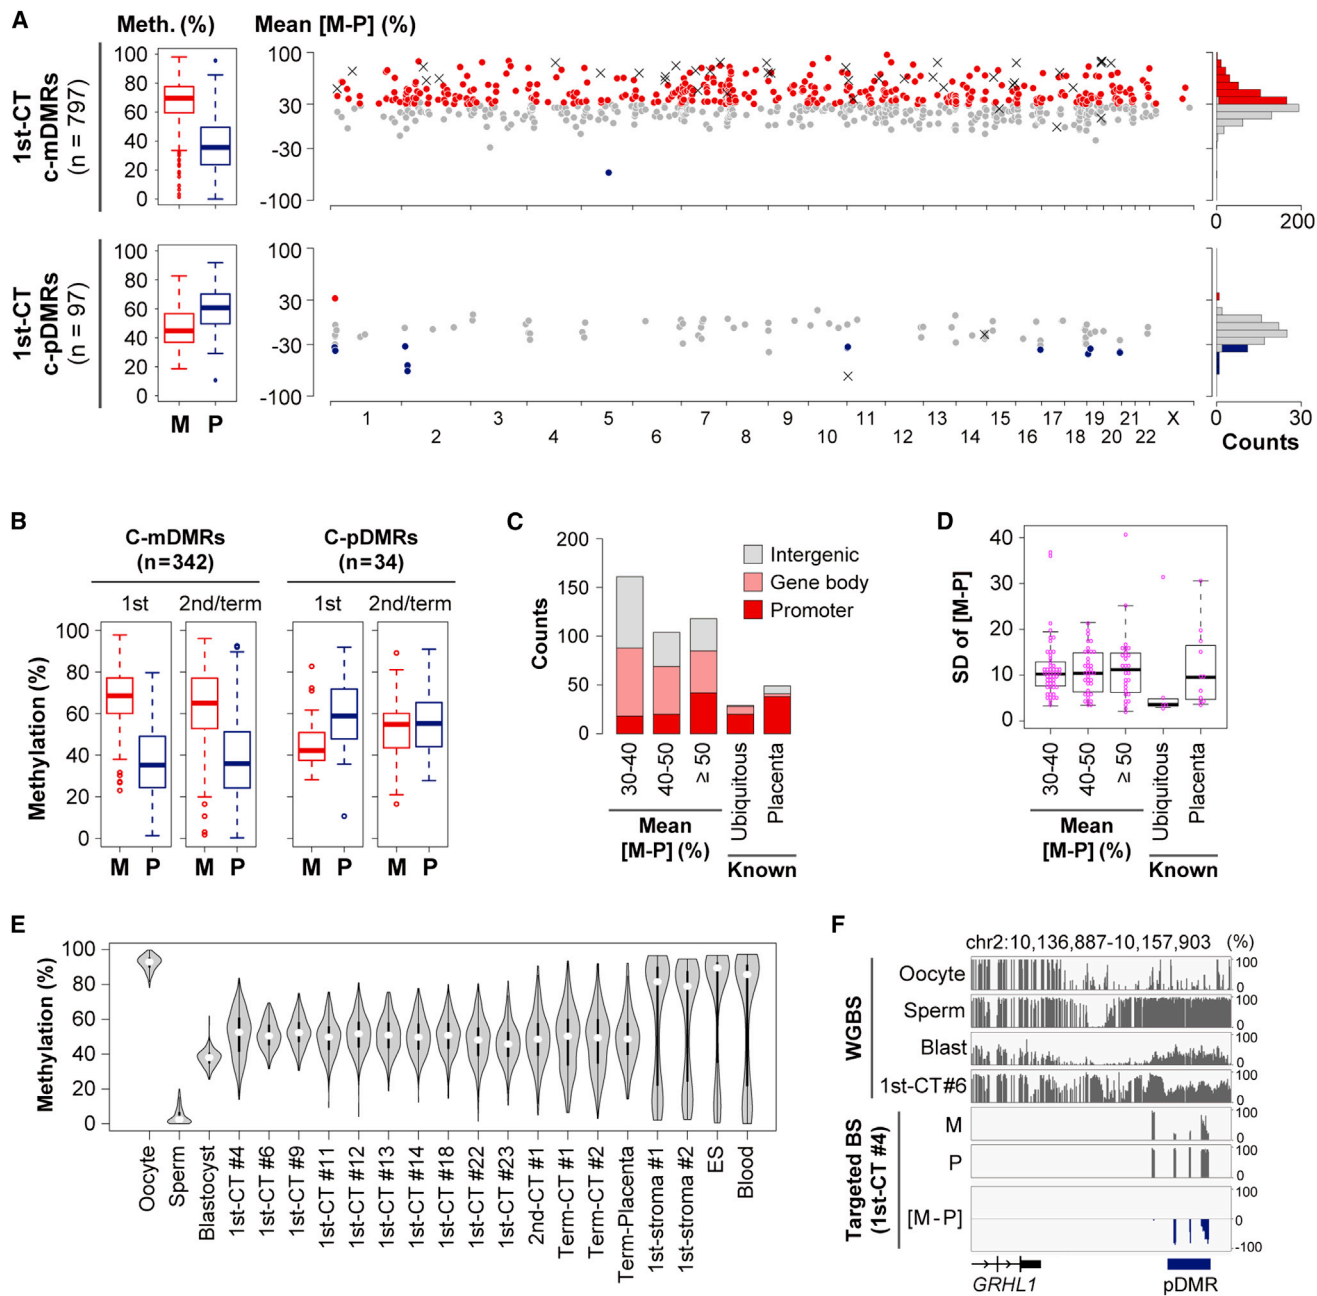

**Figure 2. Identification of gDMRs**

(A) Allelic DNA methylation patterns of candidate DMRs (c-DMRs) obtained from ten 1<sup>st</sup>-CT samples. Boxplots of methylation levels of the maternal (M) and paternal (P) alleles, chromosomal distribution of mean [M – P] values, and histograms of the distribution of the [M – P] values are shown. In the chromosome maps, red circles indicate c-DMRs showing  $\geq 30\%$  [M – P] levels and statistically significant allelic methylation differences (BH-corrected  $p < 0.05$ ). Similarly, blue circles indicate those with  $\leq -30\%$  [M – P] values. The other c-DMRs are shown as gray circles. Each x indicates a known gDMR.

(B) Box plots of allelic DNA methylation levels of candidate gDMRs covered by both 1<sup>st</sup>-CT and 2<sup>nd</sup>/term-CT samples.

(C) Classification of confirmed mDMRs according to their mean [M – P] values and location. The data of the 1<sup>st</sup>-CT samples were used. Known ubiquitous and placenta-specific mDMRs are also shown for comparison.

(D) Variations in allelic methylation between samples. We calculated the SD value for each confirmed mDMR by using the data of the 1<sup>st</sup>-CT samples. Only mDMRs for which there were data from three or more samples were analyzed. Box plots with individual data points are shown. Known ubiquitous and placenta-specific mDMRs are also included for comparison.

(E) Violin plots of methylation levels of confirmed mDMRs. 1<sup>st</sup>-CT #6 and #9 were analyzed by WGBS. Additional CT samples and stromal cells obtained from two first-trimester placentas were analyzed via targeted bisulfite sequencing. External WGBS data were used for human gametes, blastocysts, cord blood cells (DRA003802),<sup>10</sup> a term placenta analyzed without a cell purification step (GSM1134682),<sup>7</sup> and ES cells (GSM706059).<sup>31</sup> Only confirmed mDMRs covered by all the samples were analyzed ( $n = 404$ ).

(F) DNA methylation patterns of a confirmed pDMR located downstream of *GRHL1* (MIM: 609786). Each vertical bar represents a CpG site. The pDMR was hypomethylated in oocytes, hypermethylated in sperm, and paternally methylated in CT cells.

haplotype dependent, we examined haplotype-dependent allele-specific methylation (hap-ASM). In our dataset, 306 SNPs overlapping 149 candidate mDMRs were available for the hap-ASM analysis. No region was found to show hap-ASM (Figure S6). Although not all candidate mDMRs were subjected to the hap-ASM analysis as a result of the lack of informative SNPs, this result supports the conclusion that few regions with hap-ASM were included in the candidate mDMRs.

To examine the variation in allelic methylation levels between samples, we focused on confirmed mDMRs where there were data for three or more 1<sup>st</sup>-CT samples and calculated the SD values of [M – P] levels (Figure 2D). The [M – P] levels of these mDMRs are shown in Figure S7. The SD values of most of the confirmed mDMRs were 5%–15%, regardless of their mean [M – P] levels. Known placenta-specific mDMRs had SD values similar to those of the confirmed mDMRs. The SD values of known ubiquitous mDMRs (mDMRs maintained in both embryos and placentas) were lower than those of the confirmed mDMRs and known placenta-specific mDMRs. Some of the confirmed mDMRs with >15% SD values showed polymorphic imprinting (Figure S7), consistent with a previous study revealing that some placenta-specific mDMRs show polymorphic imprinting.<sup>9</sup> On the other hand, the allelic methylation levels of mDMRs with <10% SD values were relatively consistent across samples (Figure S7).

To obtain an insight into the regulation of the confirmed mDMRs in embryonic lineages, we analyzed stromal cells obtained from first-trimester placentas, which are derived from the inner cell mass (ICM) of the blastocyst. We found that about 70% of the confirmed mDMRs were hyper- or hypomethylated in stromal cells (Figure 2E). Similarly, about 80% of the confirmed mDMRs were hyper- or hypomethylated in ES and cord blood cells (Figure 2E). These data suggest that the allelic imbalance of most of the confirmed mDMRs might not be maintained in embryonic lineages.

Allelic methylation patterns of 97 and 43 candidate pDMRs were also obtained for 1<sup>st</sup>-CT and 2<sup>nd</sup>/term-CT samples, respectively. The paternal alleles (median = 60.7%) had higher methylation levels than the maternal alleles (median = 44.8%) in 1<sup>st</sup>-CT samples (Figure 2A), and several confirmed pDMRs were identified (Figure 2F and Figure S4). However, the allelic imbalance was predominantly lost, and very few regions maintained paternally biased DNA methylation in 2<sup>nd</sup>/term-CT samples (Figure 2B).

In the analyses described above, we used only CpGs covered with  $\geq 5$  reads (5 $\times$ ) for both maternal and paternal alleles. To see whether this coverage was sufficient to provide reliable allelic methylation data, we also examined the coverages at 8 $\times$  and 10 $\times$ . We found that the 8 $\times$  and 10 $\times$  data were highly correlated with the 5 $\times$  data ( $r > 0.95$ ), suggesting that coverage at 5 $\times$  was sufficient to accurately represent the allelic methylation status (Figure S8).

## Transcriptome-wide Identification of Imprinted Genes

We were next interested in whether the identified gDMRs were associated with expression of imprinted genes. RNA-sequencing-based allelic expression analyses were performed with 1<sup>st</sup>-CT samples obtained from 18 female and three male placentas. For  $\sim 75\%$  of genes with  $\geq 1$  FPKM (fragments per kilobase of exon per million fragments mapped), allelic expression was successfully analyzed in at least one sample (Figure S9A). For each gene, the proportion of reads derived from the maternal allele to total reads ([M-expression] ratio) was calculated (Figure 3A and Table S7).

We defined genes showing <35% mean [M-expression] ratios and statistically significant allelic expression differences (BH-corrected  $p < 0.05$ , binomial test) as candidate paternally expressed genes (PEGs) and identified 111 candidate PEGs, of which 25 were known PEGs (Figure 3B). It is possible that biased allelic expression of some genes is regulated by mechanisms other than genomic imprinting (e.g., polymorphisms in *cis*-regulatory elements). Therefore, we further selected candidate PEGs by using the following criteria: (1) location of confirmed or candidate mDMRs at promoter regions and (2) paternally biased expression consistently observed in at least three samples. We defined genes meeting (1) and/or (2) as strong candidate PEGs ( $n = 30$ ) (Table S8). Most of the strong candidate PEGs were associated with confirmed or candidate mDMRs (26/30), suggesting maternal allele-specific silencing by DNA methylation.

We found 445 genes with maternally biased expression (>65% [M-expression] ratios). This result should be carefully interpreted because it was difficult to exclude the maternal cell contamination completely. Genes very highly expressed in contaminating maternal cells could be mistakenly identified as maternally expressed genes (MEGs).<sup>37</sup> To avoid misidentification, we utilized SNPs that were homozygous in CT samples and heterozygous in mothers, and we estimated the expression rate from the contaminating maternal cells (contamination rate) for each gene (see Figures S9B–S9D for details). Genes with >10% mean [contamination] rates tended to show maternally biased expression, and immune-related gene ontology (GO) terms were significantly enriched in these genes. Therefore, we defined candidate MEGs as genes showing > 65% mean [M-expression] ratios, significant allelic expression differences and  $\leq 10\%$  mean [contamination] rates and identified 124 candidate MEGs. The candidate MEGs included ten known MEGs (Figure 3B). Although few candidate MEGs had confirmed or candidate gDMRs at their promoter or gene body regions, several candidate MEGs were found to be linked to PEGs with mDMRs (Figures 3C and 3D). One of these clusters contained *DNMT1* (MIM: 126375), and the DMR and imprinted expression of *DNMT1* have already been reported.<sup>38,39</sup> Our data revealed that *DNMT1* was located within an imprinted gene cluster with three

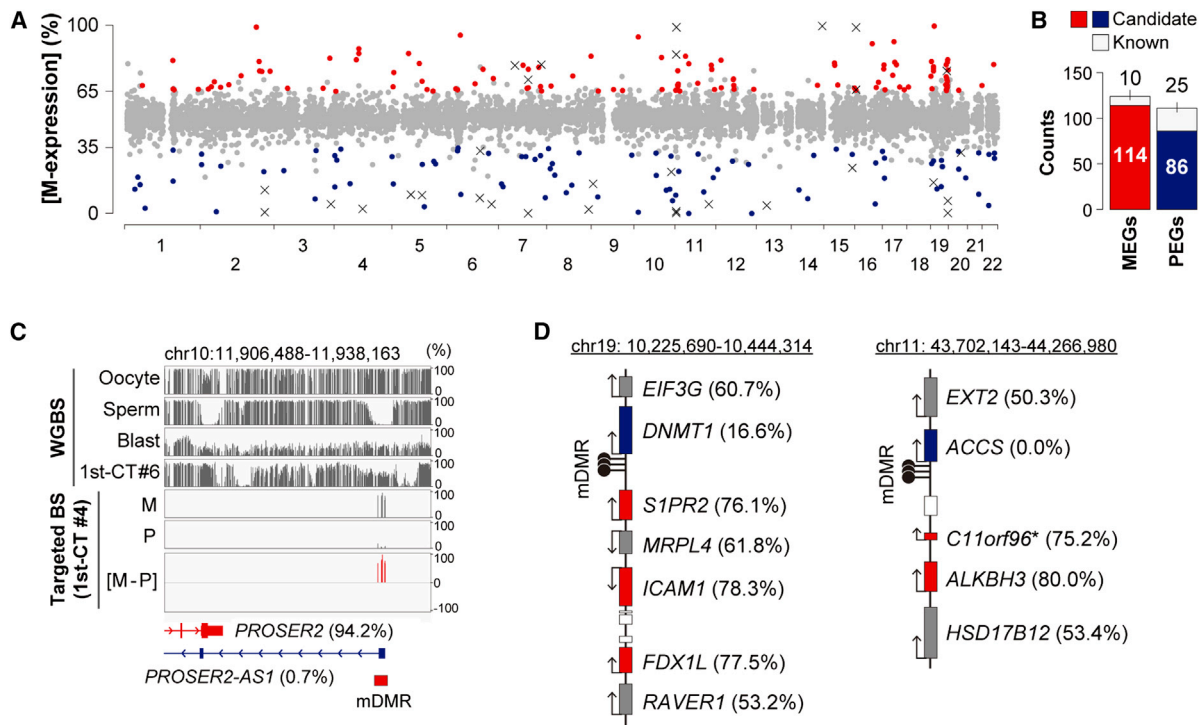

**Figure 3. Transcriptome-wide Screening of Imprinted Genes**

(A) Chromosomal distribution of candidate imprinted genes. The x axis and y axis show chromosome numbers and the maternal expression ratio ([M-expression] ratio), respectively. Genes showing  $>65\%$  [M-expression] ratios and statistically significant allelic expression differences (BH-corrected  $p < 0.05$ ) are shown in red, and those with  $<35\%$  [M-expression] ratios are in blue. Each x indicates a known imprinted gene with an [M-expression] ratio  $> 65\%$  or  $< 35\%$ . The other genes are in gray.

(B) Counts of candidate and known imprinted genes.

(C) DNA methylation patterns of the *PROSER2-AS1* DMR. [M-expression] ratios of associated genes are shown in parentheses.

(D) The *DNMT1* and *ACCS* imprinted gene clusters. Genes with [M-expression] ratios  $> 65\%$  and  $< 35\%$  are shown in red and blue, respectively. Genes with  $35\%–65\%$  [M-expression] ratios are in gray. Genes without available allelic expression ratios are shown as white boxes without gene symbols. An asterisk indicates that it was unclear whether *C11orf96* was really maternally expressed because the [contamination] rate of *C11orf96* was not available.

candidate MEGs. In consideration of these data, candidate MEGs were further selected according to the following criteria: (1) maternally biased expression consistently observed in at least three samples and (2) location in the imprinted gene clusters. We defined genes meeting criteria (1) and/or (2) as strong candidate MEGs ( $n = 14$ ) (Table S8). Strong candidate imprinted genes associated with confirmed mDMRs are highlighted in Table 1.

### Skewed X-Chromosome Inactivation (XCI) and Identification of X-Linked mDMRs

Allelic expression profiles of X-linked genes were analyzed in 1<sup>st</sup>-CT samples obtained from 18 female placentas (Figure 4A and Table S9). Most X-linked genes had similar [M-expression] ratios in each CT sample; exceptions were *XIST* [MIM: 314670] and escape genes (Figures 4A and 4B). In most of the 1<sup>st</sup>-CT samples (15/18), X-linked genes had  $>50\%$  median [M-expression] ratios (Figure 4A). Therefore, the paternal X chromosomes were preferentially inactivated in the majority of the CT samples, although three CT samples showed  $<50\%$  median [M-expression] ratios (1<sup>st</sup>-CT numbers 16–18 in Figure 4A).

Our DNA-methylation analyses identified several candidate mDMRs on the X chromosome (Table S2). By using conventional bisulfite sequencing, we confirmed maternal-allele-specific DNA methylation of one confirmed mDMR downstream of *LOC389906*; this mDMR was designated the *LOC389906*-ds DMR (Figures 4C and 4D). *LOC389906* was biallelically expressed in CT cells (Figure 4B). The allelic DNA methylation patterns of the *LOC389906*-ds DMR were not affected by the XCI status or gender (Figures 4C-D). The *LOC389906*-ds DMR was hypomethylated in blood cells (Figure 4C) and thus might be placenta specific. It was not found to be closely associated with allele-specific expression of any RefSeq genes.

We also analyzed a candidate mDMR at the promoter region of *NUDT10* in detail (this mDMR was designated the *NUDT10* DMR) (Figure 4E). Similar to the *LOC389906*-ds DMR, the *NUDT10* DMR had a highly methylated maternal allele in CT cells regardless of XCI status or gender (Figure 4F). In contrast, the paternal allele of the *NUDT10* DMR showed variable methylation levels across the samples (Figure 4F). Interestingly, the expression levels of *NUDT10* were well correlated with the XCI status in female CT samples. *NUDT10* had very low expression levels



**Table 1. Confirmed mDMRs Associated with Strong-Candidate Imprinted Genes**

| Confirmed mDMRs |             |             |         | Strong-Candidate Imprinted Genes |                |                    |
|-----------------|-------------|-------------|---------|----------------------------------|----------------|--------------------|
| Chr             | Start       | End         | [M – P] | Gene (MIM Number)                | [M-expression] | Cluster            |
| 12              | 4,433,379   | 4,433,928   | 96.5%   | <i>TIGAR</i> (610775)            | 23.6%          | -                  |
| 3               | 27,504,162  | 27,506,728  | 86.3%   | <i>SLC4A7</i> (603353)           | 22.9%          | -                  |
| 10              | 11,934,845  | 11,934,845  | 83.9%   | <i>PROSER2-AS1</i> (NA)          | 0.7%           | <i>PROSER2-AS1</i> |
| -               | -           | -           | -       | <i>PROSER2</i> (NA)              | 94.2%          | <i>PROSER2-AS1</i> |
| 7               | 129,746,868 | 129,749,725 | 82.2%   | <i>KLHDC10</i> (615152)          | 78.0%          | -                  |
| 10              | 115,999,021 | 115,999,895 | 73.3%   | <i>VWA2</i> (NA)                 | 13.0%          | -                  |
| 8               | 8,559,607   | 8,560,147   | 70.9%   | <i>CLDN23</i> (609203)           | 23.9%          | -                  |
| 11              | 93,582,929  | 93,583,380  | 61.5%   | <i>VSTM5</i> (NA)                | 11.5%          | -                  |
| 14              | 24,562,609  | 24,563,883  | 56.4%   | <i>PCK2</i> (614095)             | 12.7%          | -                  |
| 7               | 151,327,824 | 151,330,524 | 56.0%   | <i>PRKAG2</i> (602743)           | 8.4%           | -                  |
| 15              | 93,198,061  | 93,201,008  | 47.7%   | <i>FAM174B</i> (NA)              | 31.6%          | -                  |
| 11              | 44,087,195  | 44,088,588  | 46.5%   | <i>ACCS</i> (608405)             | 0.0%           | <i>ACCS</i>        |
| -               | -           | -           | -       | <i>ALKBH3</i> (610603)           | 80.0%          | <i>ACCS</i>        |

Confirmed mDMRs are arranged according to their mean [M – P] levels. See Table S8 for the full list of strong-candidate imprinted genes. NA: not available.

or was undetectable in female CT samples with predominant paternal XCI and also in male CT samples (Figure 4G). Although allelic expression of *NUDT10* was unavailable in our CT samples because of the lack of SNPs in the exonic regions, these data suggested that the maternal allele of *NUDT10* was repressed and that the paternal allele was expressed in an XCI status-dependent manner. The expression level of *NUDT10* might be a good marker for analysis of the XCI status in CT cells. Similar to the *LOC389906*-ds DMR, the *NUDT10* DMR was unmethylated in male blood cells (Figure 4E).

### Evolutionary Variability of mDMRs and Imprinted Genes in Mammalian Placentas

Using previously reported mouse WGBS data,<sup>13,32,33</sup> we analyzed DNA methylation levels of mouse regions orthologous to the human candidate mDMRs identified in our study. In all, 723 mouse regions were successfully analyzed, but only five had methylation patterns similar to those of known mDMRs (hypermethylated in oocytes, hypomethylated in sperm, 25%–65% methylation in blastocysts, and 30%–70% methylation in the placenta) (Figure S10A).

We also identified 44 strong candidate imprinted genes (30 PEGs and 14 MEGs) in the human placental CT cells. None of these are reported to be imprinted in the mouse placenta. In addition, among the known mouse placenta-specific imprinted genes, only one (*Ppp1r9a*) was confirmed to be imprinted in human CT cells (Figure S10B). Placental imprinting has not been explored in detail in mammalian species other than humans and mice, but a recent study of RNA-sequencing-based screening of placental imprinted genes in hybrids of the horse and donkey identified 78 candidate imprinted

genes.<sup>29</sup> Of these candidates, only *MUC1* (MIM: 158340) and *FKBP5* (MIM: 602623) showed imprinted expression patterns in the human placenta (Figure S10C). Neither gene was associated with candidate gDMRs in human CT cells. Further studies are required to determine whether *MUC1* and *FKBP5* are conserved imprinted genes. Taken together, these data suggest that the placental imprinting of genes is also poorly conserved across mammalian species.

## Discussion

### Mechanisms of Maintenance of Oocyte-Specific Methylation in the Human Placenta

In this study, we identified 3,676 candidate mDMRs. We successfully analyzed allelic methylation for 904 regions and confirmed 440 regions as mDMRs. These data imply that there are ~1,800 mDMRs present in the human placenta. Although the allelic methylation biases of most confirmed mDMRs were relatively weaker than those of known mDMRs, the biases were maintained in the placenta throughout gestation. Most of the confirmed mDMRs identified in this study were probably placenta-specific given that these regions were predominantly hypermethylated in embryonic cells. Determination of which gDMRs identified in this study are maintained during the preimplantation stage and identification of the stage at which the gDMRs are lost in the embryonic lineage will require analysis of allelic DNA methylation in the human trophoblast and ICM.

Recently, Hanna et al. analyzed triploid placentas by using the Illumina Infinium HumanMethylation450 array

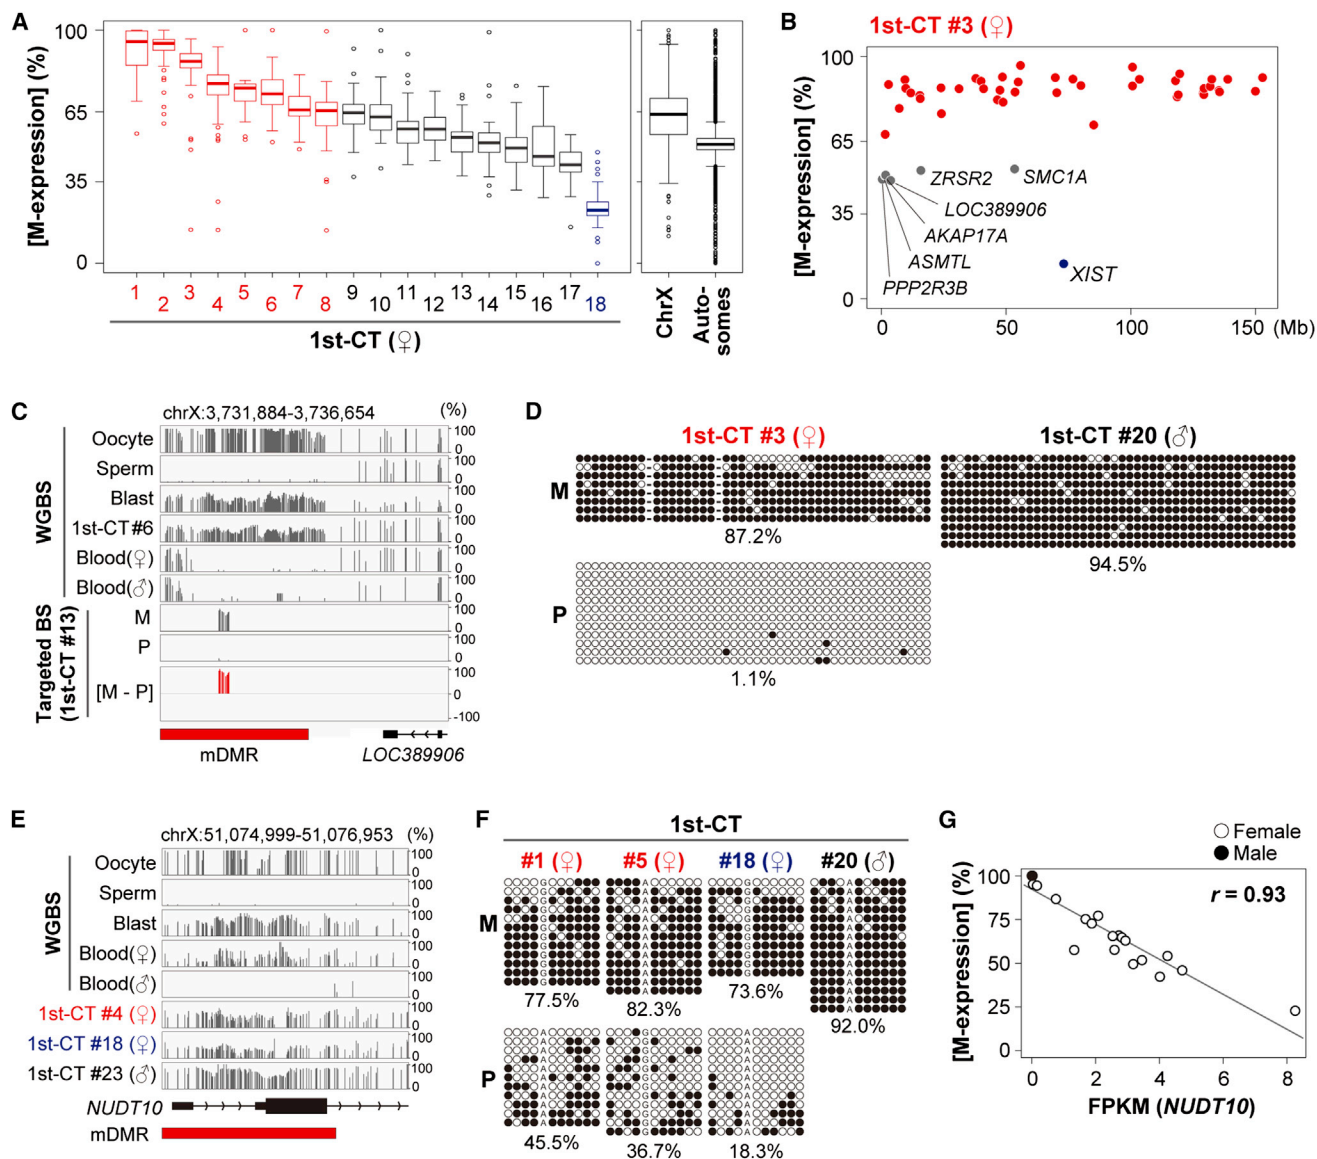

**Figure 4. Allelic Regulation of X-Linked Genes and gDMRs**

(A) Boxplots of maternal expression ratios ([M-expression] ratios) of X-linked genes. (Left) 18 1<sup>st</sup>-CT samples were analyzed, and samples with >65% and <35% median [M-expression] ratios are shown in red and blue, respectively. (Right) Summary of allelic expression of X-linked and autosomal genes from the 18 1<sup>st</sup>-CT samples. X-linked genes had higher [M-expression] ratios than autosomal genes ( $p < 2.2 \times 10^{-16}$ , Mann Whitney U-test).

(B) A chromosome map of [M-expression] ratios of X-linked genes (1<sup>st</sup>-CT #3). Genes with >65% [M-expression] ratios are shown in red, and those with 35%–65% [M-expression] ratios are in gray with gene symbols. The [M-expression] ratio of *XIST* was 14.4% (shown in blue).

(C) DNA methylation patterns of the *LOC389906*-ds DMR. *LOC389906* is an escape gene as shown in (B).

(D) Bisulfite sequencing analysis of the *LOC389906*-ds DMR. Black and white circles indicate methylated and unmethylated residues, respectively. The percentages of methylated CpG sites are indicated.

(E) DNA methylation patterns of the *NUDT10* DMR.

(F) Bisulfite sequencing analysis of the *NUDT10* DMR.

(G) A high correlation between *NUDT10* expression levels and the median [M-expression] ratios of X-linked genes. 18 female and three male 1<sup>st</sup>-CT samples were analyzed. Pearson's  $r$  was 0.93.

(450K array) and, in combination with reduced representation bisulfite sequencing (RRBS) data of human gametes and blastocysts, identified 101 putative mDMRs (11 of them were shown to be maternally methylated in normal placental samples).<sup>9</sup> For 31 of them, the allelic methylation patterns were available in our dataset. We confirmed

maternal methylation of 25 of the 31 putative mDMRs. The analysis by Hanna et al. was restricted to CpG islands covered by both the 450K array and RRBS data. Our WGBS-based analysis is consequently more comprehensive than that of Hanna et al. It should also be noted that our cutoff criteria for mDMRs were more stringent than those used by

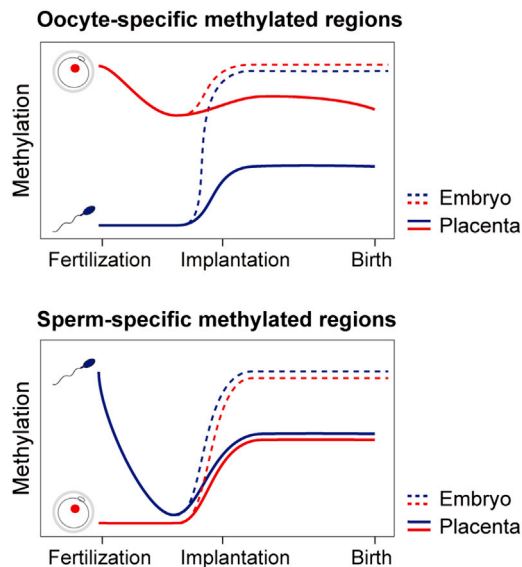

**Figure 5. Schematic Illustration of Allelic DNA Methylation Levels of Oocyte- and Sperm-Specific Methylated Regions during Human Development**

For oocyte-specific methylated regions, the maternal alleles maintain high methylation levels throughout human development. The paternal alleles are predominantly hypermethylated in the embryonic lineage after implantation, but the de novo methylation and/or methylation maintenance of the paternal alleles are incomplete in the placenta. Consequently, many oocyte-specific methylated regions maintain maternally biased DNA methylation in the placenta. In contrast, sperm-specific methylated regions are demethylated during preimplantation development, and very few regions maintain paternally biased DNA methylation after implantation.

Hanna et al. (Figure S2B). Our data strongly suggest that there are ~18 times more mDMRs in the human placenta than expected by Hanna et al.

The placenta-specific maintenance of mDMRs can be mainly explained by two mechanisms: (1) incomplete demethylation of the maternal alleles during preimplantation development and (2) incomplete de novo methylation and/or inefficient methylation maintenance of the paternal alleles after implantation (Figure 5). In human CT cells, the DNA methyltransferases and *UHRF1* (MIM: 607990), which targets DNMT1 to hemimethylated sites,<sup>40</sup> were all highly expressed (FPKM was >100 for *DNMT1*, >10 for *DNMT3A* [MIM: 602769] and *DNMT3B* [MIM: 602900], and ~10 for *UHRF1*). Therefore, site-specific exclusion of methyltransferases and/or selective recruitment of factors involved in demethylation might be important for the maintenance of mDMRs in the human placenta. Lack of transcription might be one of the mechanisms because gene body methylation positively correlates with gene expression levels in the human placenta.<sup>14</sup> Consistent with this hypothesis, more than one-third of the confirmed mDMRs identified in this study were located in intergenic regions. Additionally, the candidate mDMRs identified in this study were significantly enriched (1,917/3,676,  $p < 2.2 \times 10^{-16}$ ; chi-square test)

in the partially methylated domains where genes are preferentially repressed.<sup>14</sup> In contrast to the oocyte-specific methylated regions, most sperm-specific methylated regions did not maintain paternally biased methylation in the human placenta, which can be explained by the global and nearly complete demethylation of the paternal genome after fertilization (Figure 5).

### Functions of Placenta-Specific mDMRs and Imprinted Genes

We identified 44 strong candidate imprinted genes (30 PEGs and 14 MEGs), and seven of them were located in three imprinted gene clusters. The strong candidate imprinted genes included several genes that might play important roles in placental development. For example, *CUL7* (MIM: 609577) was paternally expressed in the human placenta and encodes an E3 ubiquitin ligase scaffold protein. *Cul7*-deficient mouse embryos exhibit IUGR, and their placentas show defects in the differentiation of the trophoblast lineage and an abnormal vascular structure.<sup>41</sup> *CUL7* is reported to show abnormal expression in human IUGR placentas.<sup>42</sup> Another example is *CYP2J2* (MIM: 601258), which encodes an arachidonic acid epoxygenase. *CYP2J2* and its metabolites are elevated in preeclamptic human placentas, and preeclamptic features are improved by a CYP epoxygenase inhibitor in rat models of preeclampsia.<sup>43</sup> These data suggest that abnormal expression of some of the candidate imprinted genes could increase the risk of pregnancy complications such as IUGR and preeclampsia.

Recently, Sanchez-Delgado et al. reported ten novel imprinted genes.<sup>8</sup> For five of them (*CMTM3* [MIM: 607886], *RHOBTB3* [MIM: 607353], *RASGRF1* [MIM: 606600], *SCIN* [MIM: 613416], and *ZFP90* [MIM: 609451]), the allelic expression patterns were available in our dataset. Three (*CMTM3*, *RHOBTB3*, and *ZFP90*) were confirmed to be imprinted. *SCIN* was not classified as imprinted in our study, although there was paternally biased expression ([M-expression] = 36.1%). Although *RASGRF1* was found to be biallelically expressed ([M-expression] = 50.0%) in one informative sample, the imprinting of *RASGRF1* is already known to be polymorphic.<sup>8</sup> Overall, our data are consistent with those of Sanchez-Delgado et al.

It should be noted that there were some limitations in our RNA sequencing analyses. First, splicing variant- or transcription-start-site-specific imprinting was difficult to analyze. Second, developmental-stage- and cell-type-specific imprinted genes were difficult to identify. Finally, small RNAs, RNAs without poly-A tails, and other RNAs unannotated in the Refseq database were not analyzed in this study. For these reasons, we speculate that there could be more imprinted genes and transcripts in the human placenta. The gDMRs identified in this study should provide a useful platform with which to identify these additional imprinted genes and transcripts in future studies.

Many of the confirmed mDMRs identified in this study, especially those located in gene bodies or intergenic

regions, were not found to be closely associated with allele-specific expression. Likewise, only some of the known placenta-specific mDMRs were confirmed to be associated with allele-specific expression.<sup>7,8</sup> Although the functional roles of such mDMRs are currently unclear, there are several possibilities. Our approach might not have captured all the imprinted genes. Consequently, some of the mDMRs might in fact regulate allele-specific expression of unidentified genes or transcripts. Furthermore, gDMRs can act over several megabases,<sup>44</sup> and thus it is also possible that some mDMRs are linked to imprinted genes located at a distance. Additionally, some mDMRs could act as enhancers given that a motif similar to the binding sites of transcription factors such as EGR1 and SP2 was enriched in mDMRs. In such cases, their effects on allelic expression biases might not be strong enough to be detected in this study. Finally, some mDMRs could be by-products of incomplete reprogramming of germline methylation and have no functional importance in the regulation of gene expression.

### Genomic Imprinting on the X Chromosome

There have been many reports investigating XCI patterns in the human placenta.<sup>45</sup> Some studies suggest random XCI, whereas others support preferential paternal XCI. Our RNA sequencing analyses have several advantages over previous studies because (1) the contamination of non-trophoblast cells was minimized, (2) purifying CT cells from whole placentas avoided sampling biases (the XCI patterns might be mosaic), and (3) chromosome-wide allelic expression data were available. We observed variable degrees of preferential paternal XCI in most of our samples. Although studies with a larger sample size and different ethnic groups are needed to support a firm conclusion, our data lend support to weakly skewed paternal XCI in the human placenta.

Neither X-linked imprinted genes nor gDMRs have been identified in the human genome, but it has been proposed that there might be imprinted genes on the human X chromosome. For example, in Turner's syndrome, the degree of the deficit in social cognition is dependent on the parent of origin of the missing X chromosome.<sup>46</sup> In this study, we identified some X-linked mDMRs and also a putative paternally expressed imprinted gene, *NUDT10*. This gene encodes a diphosphoinositol polyphosphate phosphohydrolase, and its role in placental development is currently unknown. Further studies are required to explain the functional importance of X-linked mDMRs and imprinted genes and to clarify the underlying mechanisms of functional differences of the parental X chromosomes.

### Evolutionary Variability of Genomic Imprinting in Mammalian Placentas

This and previous studies suggest that placenta-specific gDMRs and imprinted genes are poorly conserved between humans and mice.<sup>7,37,47</sup> We identified many

mDMRs in the human placenta, whereas few placenta-specific gDMRs have been reported in the mouse. In mouse blastocysts, both the maternal and paternal genomes are significantly demethylated,<sup>48,49</sup> whereas the maternal genome is demethylated to a much lesser extent than the paternal genome in human blastocysts.<sup>10</sup> The differential regulation of the demethylation of the maternal genome between humans and mice may, in part, explain the increased number of mDMRs and imprinted genes in the human placenta. To further understand the evolutionary variation of placental imprinting, it will be important to compare allelic DNA methylation and expression patterns in placentas from a number of mammalian species.

### Conclusions

In conclusion, we have revealed the unique patterns of allelic DNA methylation in the human placenta. The findings are fundamental to our understanding of normal placental development as well as developmental disorders with imprinting effects. Our study also highlights the variability of genomic imprinting in mammalian placentas. The critical role of the placenta in transport and endocrine production is conserved among placental mammals, but the placental anatomy and trophoblastic subtypes are highly variable.<sup>50</sup> Genomic imprinting might have continually coevolved within the placenta in a species-specific manner, contributing to the diversification of mammalian placentas.

### Accession Numbers

All sequencing data reported in this paper have been deposited in the DDBJ Japanese Genotype-phenotype Archive under accession number JGAS00000000038.

### Supplemental Data

Supplemental Data include ten figures, nine tables, and Supplemental Materials and Methods and can be found with this article online at <http://dx.doi.org/10.1016/j.ajhg.2016.08.021>.

### Acknowledgments

We thank all the individuals and their families who participated in this study. We also thank Professor K. Nakayama, Dr. R. Funayama, Ms. N. Miyauchi, Ms. A. Kitamura, Ms. M. Tsuda, Ms. M. Kikuchi, Ms. M. Nakagawa, and Mr. K. Kuroda for technical assistance and Professor Rosalind M. John for support and valuable suggestions. We are also grateful to the Biomedical Research Core of Tohoku University Graduate School of Medicine for technical support. This work was supported by Grants-in-Aid for Scientific Research (KAKENHI) (15K15592), the Japan Agency for Medical Research and Development (AMED) (15ek0109132, 15ek0109101h0001), Banyu Life Science Foundation International, Smoking Research Foundation, and the Takeda Science Foundation to TA and KAKENHI (26112502, 15K10657) to HO. This work was also supported by the Core Research for Evolutional Science and Technology (CREST) from AMED (HS and TA).

Received: June 8, 2016  
Accepted: August 31, 2016  
Published: October 27, 2016

## Web Resources

BamUtil, <http://genome.sph.umich.edu/wiki/BamUtil>  
Catalogue of Parental Origin Effects database, <http://igc.otago.ac.nz/home.html>  
IGV, <http://www.broadinstitute.org/igv>  
OMIM, <http://www.omim.org>  
R, <http://www.R-project.org>  
UCSC Genome Browser, <https://genome.ucsc.edu>  
Vioplot, <http://wsopuppenkiste.wiso.uni-goettingen.de/~dadler>

## References

1. Saitou, M., Kagiwada, S., and Kurimoto, K. (2012). Epigenetic reprogramming in mouse pre-implantation development and primordial germ cells. *Development* 139, 15–31.
2. Messerschmidt, D.M., Knowles, B.B., and Solter, D. (2014). DNA methylation dynamics during epigenetic reprogramming in the germline and preimplantation embryos. *Genes Dev.* 28, 812–828.
3. Sasaki, H., and Matsui, Y. (2008). Epigenetic events in mammalian germ-cell development: reprogramming and beyond. *Nat. Rev. Genet.* 9, 129–140.
4. Ferguson-Smith, A.C. (2011). Genomic imprinting: the emergence of an epigenetic paradigm. *Nat. Rev. Genet.* 12, 565–575.
5. John, R.M., and Surani, M.A. (1996). Imprinted genes and regulation of gene expression by epigenetic inheritance. *Curr. Opin. Cell Biol.* 8, 348–353.
6. Proudhon, C., Duffié, R., Ajjan, S., Cowley, M., Iranzo, J., Carbajosa, G., Saadeh, H., Holland, M.L., Oakey, R.J., Rakyen, V.K., et al. (2012). Protection against de novo methylation is instrumental in maintaining parent-of-origin methylation inherited from the gametes. *Mol. Cell* 47, 909–920.
7. Court, F., Tayama, C., Romanelli, V., Martin-Trujillo, A., Iglesias-Platas, I., Okamura, K., Sugahara, N., Simón, C., Moore, H., Harness, J.V., et al. (2014). Genome-wide parent-of-origin DNA methylation analysis reveals the intricacies of human imprinting and suggests a germline methylation-independent mechanism of establishment. *Genome Res.* 24, 554–569.
8. Sanchez-Delgado, M., Martin-Trujillo, A., Tayama, C., Vidal, E., Esteller, M., Iglesias-Platas, I., Deo, N., Barney, O., Maclean, K., Hata, K., et al. (2015). Absence of Maternal Methylation in Biparental Hydatidiform Moles from Women with NLRP7 Maternal-Effect Mutations Reveals Widespread Placenta-Specific Imprinting. *PLoS Genet.* 11, e1005644.
9. Hanna, C.W., Peñaherrera, M.S., Saadeh, H., Andrews, S., McFadden, D.E., Kelsey, G., and Robinson, W.P. (2016). Pervasive polymorphic imprinted methylation in the human placenta. *Genome Res.* 26, 756–767.
10. Okae, H., Chiba, H., Hiura, H., Hamada, H., Sato, A., Utsunomiya, T., Kikuchi, H., Yoshida, H., Tanaka, A., Suyama, M., and Arima, T. (2014). Genome-wide analysis of DNA methylation dynamics during early human development. *PLoS Genet.* 10, e1004868.
11. Guo, H., Zhu, P., Yan, L., Li, R., Hu, B., Lian, Y., Yan, J., Ren, X., Lin, S., Li, J., et al. (2014). The DNA methylation landscape of human early embryos. *Nature* 511, 606–610.
12. Smith, Z.D., Chan, M.M., Humm, K.C., Karnik, R., Mekhoubad, S., Regev, A., Eggan, K., and Meissner, A. (2014). DNA methylation dynamics of the human preimplantation embryo. *Nature* 511, 611–615.
13. Hon, G.C., Rajagopal, N., Shen, Y., McCleary, D.F., Yue, F., Dang, M.D., and Ren, B. (2013). Epigenetic memory at embryonic enhancers identified in DNA methylation maps from adult mouse tissues. *Nat. Genet.* 45, 1198–1206.
14. Schroeder, D.I., Blair, J.D., Lott, P., Yu, H.O., Hong, D., Crary, F., Ashwood, P., Walker, C., Korf, I., Robinson, W.P., and LaSalle, J.M. (2013). The human placenta methylome. *Proc. Natl. Acad. Sci. USA* 110, 6037–6042.
15. Schroeder, D.I., Jayashankar, K., Douglas, K.C., Thirkill, T.L., York, D., Dickinson, P.J., Williams, L.E., Samollow, P.B., Ross, P.J., Bannasch, D.L., et al. (2015). Early Developmental and Evolutionary Origins of Gene Body DNA Methylation Patterns in Mammalian Placentas. *PLoS Genet.* 11, e1005442.
16. Robinson, W.P., and Price, E.M. (2015). The human placental methylome. *Cold Spring Harb. Perspect. Med.* 5, a023044.
17. Jacob, K.J., Robinson, W.P., and Lefebvre, L. (2013). Beckwith-Wiedemann and Silver-Russell syndromes: opposite developmental imbalances in imprinted regulators of placental function and embryonic growth. *Clin. Genet.* 84, 326–334.
18. Frost, J.M., and Moore, G.E. (2010). The importance of imprinting in the human placenta. *PLoS Genet.* 6, e1001015.
19. Fisher, R.A., and Hodges, M.D. (2003). Genomic imprinting in gestational trophoblastic disease—a review. *Placenta* 24 (Suppl A), S111–S118.
20. Tomizawa, S., and Sasaki, H. (2012). Genomic imprinting and its relevance to congenital disease, infertility, molar pregnancy and induced pluripotent stem cell. *J. Hum. Genet.* 57, 84–91.
21. Kliman, H.J., Nestler, J.E., Sermasi, E., Sanger, J.M., and Strauss, J.F., 3rd. (1986). Purification, characterization, and in vitro differentiation of cytotrophoblasts from human term placentae. *Endocrinology* 118, 1567–1582.
22. Bischof, P., and Irminger-Finger, I. (2005). The human cytotrophoblastic cell, a mononuclear chameleon. *Int. J. Biochem. Cell Biol.* 37, 1–16.
23. Miura, F., Enomoto, Y., Dairiki, R., and Ito, T. (2012). Amplification-free whole-genome bisulfite sequencing by post-bisulfite adaptor tagging. *Nucleic Acids Res.* 40, e136.
24. Miura, F., and Ito, T. (2015). Highly sensitive targeted methylome sequencing by post-bisulfite adaptor tagging. *DNA Res.* 22, 13–18.
25. Krueger, F., and Andrews, S.R. (2011). Bismark: a flexible aligner and methylation caller for Bisulfite-Seq applications. *Bioinformatics* 27, 1571–1572.
26. Langmead, B., and Salzberg, S.L. (2012). Fast gapped-read alignment with Bowtie 2. *Nat. Methods* 9, 357–359.
27. McKenna, A., Hanna, M., Banks, E., Sivachenko, A., Cibulskis, K., Kernysky, A., Garimella, K., Altshuler, D., Gabriel, S., Daly, M., and DePristo, M.A. (2010). The Genome Analysis Toolkit: a MapReduce framework for analyzing next-generation DNA sequencing data. *Genome Res.* 20, 1297–1303.
28. Trapnell, C., Roberts, A., Goff, L., Pertea, G., Kim, D., Kelley, D.R., Pimentel, H., Salzberg, S.L., Rinn, J.L., and Pachter, L. (2012). Differential gene and transcript expression analysis of RNA-seq experiments with TopHat and Cufflinks. *Nat. Protoc.* 7, 562–578.

29. Wang, X., Miller, D.C., Harman, R., Antczak, D.F., and Clark, A.G. (2013). Paternally expressed genes predominate in the placenta. *Proc. Natl. Acad. Sci. USA* *110*, 10705–10710.
30. Huang, D.W., Sherman, B.T., Tan, Q., Collins, J.R., Alvord, W.G., Roayaei, J., Stephens, R., Baseler, M.W., Lane, H.C., and Lempicki, R.A. (2007). The DAVID Gene Functional Classification Tool: a novel biological module-centric algorithm to functionally analyze large gene lists. *Genome Biol.* *8*, R183.
31. Lister, R., Pelizzola, M., Kida, Y.S., Hawkins, R.D., Nery, J.R., Hon, G., Antosiewicz-Bourget, J., O'Malley, R., Castanon, R., Klugman, S., et al. (2011). Hotspots of aberrant epigenomic reprogramming in human induced pluripotent stem cells. *Nature* *471*, 68–73.
32. Shirane, K., Toh, H., Kobayashi, H., Miura, E., Chiba, H., Ito, T., Kono, T., and Sasaki, H. (2013). Mouse oocyte methylomes at base resolution reveal genome-wide accumulation of non-CpG methylation and role of DNA methyltransferases. *PLoS Genet.* *9*, e1003439.
33. Kobayashi, H., Sakurai, T., Imai, M., Takahashi, N., Fukuda, A., Yayoi, O., Sato, S., Nakabayashi, K., Hata, K., Sotomaru, Y., et al. (2012). Contribution of intragenic DNA methylation in mouse gametic DNA methylomes to establish oocyte-specific heritable marks. *PLoS Genet.* *8*, e1002440.
34. Robinson, J.T., Thorvaldsdóttir, H., Winckler, W., Guttman, M., Lander, E.S., Getz, G., and Mesirov, J.P. (2011). Integrative genomics viewer. *Nat. Biotechnol.* *29*, 24–26.
35. Georgiades, P., Ferguson-Smith, A.C., and Burton, G.J. (2002). Comparative developmental anatomy of the murine and human definitive placentae. *Placenta* *23*, 3–19.
36. Machanick, P., and Bailey, T.L. (2011). MEME-ChIP: motif analysis of large DNA datasets. *Bioinformatics* *27*, 1696–1697.
37. Okae, H., Hiura, H., Nishida, Y., Funayama, R., Tanaka, S., Chiba, H., Yaegashi, N., Nakayama, K., Sasaki, H., and Arima, T. (2012). Re-investigation and RNA sequencing-based identification of genes with placenta-specific imprinted expression. *Hum. Mol. Genet.* *21*, 548–558.
38. Das, R., Lee, Y.K., Strogantsev, R., Jin, S., Lim, Y.C., Ng, P.Y., Lin, X.M., Chng, K., Yeo, G.Sh., Ferguson-Smith, A.C., and Ding, C. (2013). DNMT1 and AIM1 Imprinting in human placenta revealed through a genome-wide screen for allele-specific DNA methylation. *BMC Genomics* *14*, 685.
39. Yuen, R.K., Jiang, R., Peñaherrera, M.S., McFadden, D.E., and Robinson, W.P. (2011). Genome-wide mapping of imprinted differentially methylated regions by DNA methylation profiling of human placentas from triploidies. *Epigenetics Chromatin* *4*, 10.
40. Sharif, J., Muto, M., Takebayashi, S., Suetake, I., Iwamatsu, A., Endo, T.A., Shinga, J., Mizutani-Koseki, Y., Toyoda, T., Okamura, K., et al. (2007). The SRA protein Np95 mediates epigenetic inheritance by recruiting Dnmt1 to methylated DNA. *Nature* *450*, 908–912.
41. Arai, T., Kasper, J.S., Skaar, J.R., Ali, S.H., Takahashi, C., and DeCaprio, J.A. (2003). Targeted disruption of p185/Cul7 gene results in abnormal vascular morphogenesis. *Proc. Natl. Acad. Sci. USA* *100*, 9855–9860.
42. Gascoin-Lachambre, G., Buffat, C., Rebourcet, R., Chelbi, S.T., Rigourd, V., Mondon, F., Mignot, T.M., Legras, E., Simeoni, U., Vaiman, D., and Barbaux, S. (2010). Cullins in human intra-uterine growth restriction: expressional and epigenetic alterations. *Placenta* *31*, 151–157.
43. Herse, F., Lamarca, B., Hubel, C.A., Kaartokallio, T., Lokki, A.I., Ekholm, E., Laivuori, H., Gauster, M., Huppertz, B., Sugulle, M., et al. (2012). Cytochrome P450 subfamily 2J polypeptide 2 expression and circulating epoxyeicosatrienoic metabolites in preeclampsia. *Circulation* *126*, 2990–2999.
44. Bartolomei, M.S., and Ferguson-Smith, A.C. (2011). Mammalian genomic imprinting. *Cold Spring Harb. Perspect. Biol.* *3*, 3.
45. Moreira de Mello, J.C., de Araújo, E.S., Stabellini, R., Fraga, A.M., de Souza, J.E., Sumita, D.R., Camargo, A.A., and Pereira, L.V. (2010). Random X inactivation and extensive mosaicism in human placenta revealed by analysis of allele-specific gene expression along the X chromosome. *PLoS ONE* *5*, e10947.
46. Knickmeyer, R.C. (2012). Turner syndrome: advances in understanding altered cognition, brain structure and function. *Curr. Opin. Neurol.* *25*, 144–149.
47. Monk, D., Arnaud, P., Apostolidou, S., Hills, F.A., Kelsey, G., Stanier, P., Feil, R., and Moore, G.E. (2006). Limited evolutionary conservation of imprinting in the human placenta. *Proc. Natl. Acad. Sci. USA* *103*, 6623–6628.
48. Wang, L., Zhang, J., Duan, J., Gao, X., Zhu, W., Lu, X., Yang, L., Zhang, J., Li, G., Ci, W., et al. (2014). Programming and inheritance of parental DNA methylomes in mammals. *Cell* *157*, 979–991.
49. Smith, Z.D., Chan, M.M., Mikkelsen, T.S., Gu, H., Gnirke, A., Regev, A., and Meissner, A. (2012). A unique regulatory phase of DNA methylation in the early mammalian embryo. *Nature* *484*, 339–344.
50. Furukawa, S., Kuroda, Y., and Sugiyama, A. (2014). A comparison of the histological structure of the placenta in experimental animals. *J. Toxicol. Pathol.* *27*, 11–18.

**The American Journal of Human Genetics, Volume 99**

**Supplemental Data**

**Allele-Specific Methylome and Transcriptome Analysis**

**Reveals Widespread Imprinting in the Human Placenta**

**Hiroataka Hamada, Hiroaki Okae, Hidehiro Toh, Hatsune Chiba, Hitoshi Hiura, Kenjiro Shirane, Tetsuya Sato, Mikita Suyama, Nobuo Yaegashi, Hiroyuki Sasaki, and Takahiro Arima**

**A**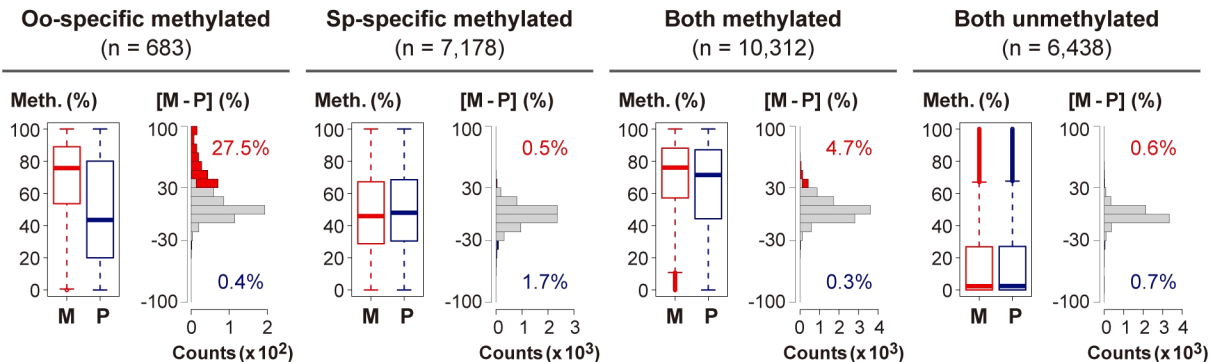**B**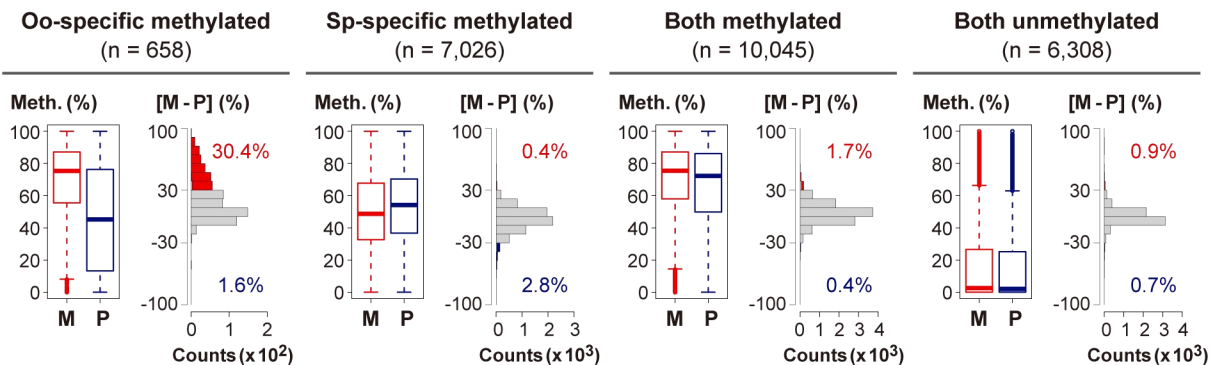**C**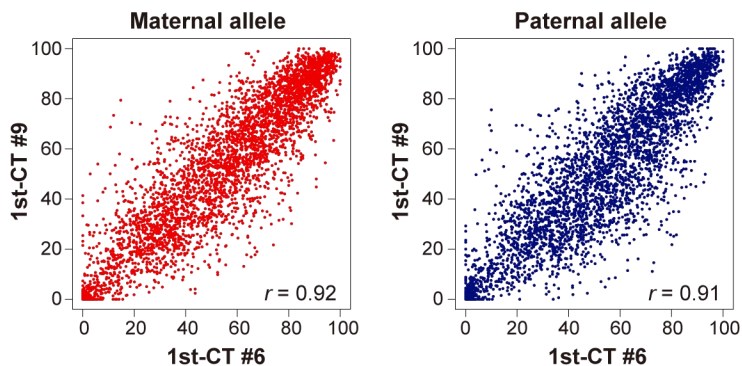



**Figure S1. Maintenance of allelic DNA methylation of oocyte-specific methylated windows**

(A) Box plots of methylation levels of the maternal (M) and paternal (P) alleles of windows (1st-CT #9). Boxes represent lower and upper quartiles and horizontal lines indicate the median. Whiskers extend to the most extreme data points within 1.5 times the interquartile range from the boxes. The open circles indicate the data points outside the whiskers. Histograms of the distribution of the [M-P] levels are also shown. 27.5% of oocyte-specific methylated windows were maternally methylated.

(B) Box plots of methylation levels of the maternal (M) and paternal (P) alleles of windows (1st-CT #6: the sample analyzed in Figure 1). For comparison, an equal number of reads of 1st-CT#9 were randomly extracted from the reads of 1st-CT #6. Histograms of the distribution of the [M-P] levels are also shown.

(C) Comparison of allelic methylation levels between 1st-CT #6 and 1st-CT #9. As described above, we used randomly extracted reads for 1st-CT #6. 4,307 windows were covered by both 1st-CT #6 and 1st-CT #9, and were analyzed. The allelic methylation levels were strongly correlated between these two samples (Pearson's  $r > 0.9$ ).

**A**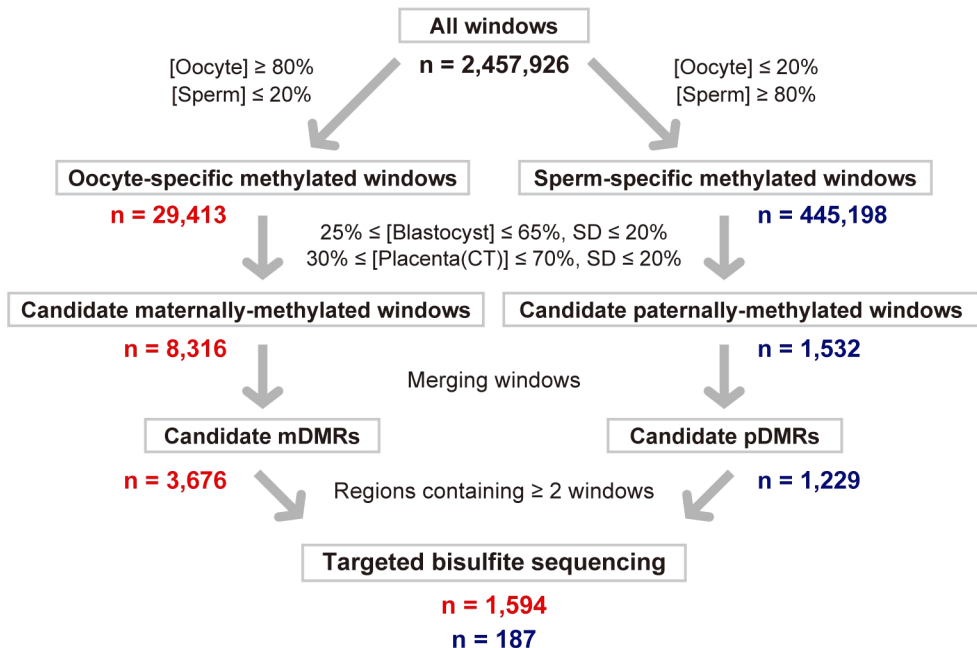**B****Present study**

| [Oocyte] | [Sperm] | [Blastocyst] | [Placenta] | [M-P] |
|----------|---------|--------------|------------|-------|
| ≥ 80%    | ≤ 20%   | 25-65%       | 30-70%     | ≥ 30% |

**Hanna et al.**

| [Oocyte - Sperm] | [Blastocyst] | [M-P]  |
|------------------|--------------|--------|
| > 50%            | 15-60%       | > 15%* |

## **Figure S2. Selection of candidate gDMRs for targeted bisulfite sequencing**

**(A)** We focused on oocyte- and sperm-specific methylated windows maintaining 25-65% methylation levels with  $\leq 20\%$  standard deviations (SD) in blastocysts and 30-70% methylation levels with  $\leq 20\%$  SD in CT cells (the WGBS data of 1st-CT #6 was used). After merging windows within 500 bp of each other, we obtained 3,676 candidate mDMRs and 1,229 pDMRs except for known gDMRs. 1,594 candidate mDMRs and 187 candidate pDMRs containing  $\geq 2$  windows were selected for targeted bisulfite sequencing analyses.

**(B)** Comparison of the cutoff values for mDMRs. Our cutoff values were more stringent than those of Hanna et al. <sup>1</sup>. \*: the original criterion is “> 5% difference in methylation between diandric and digynic triploids”, which corresponds to > 15% [M-P].

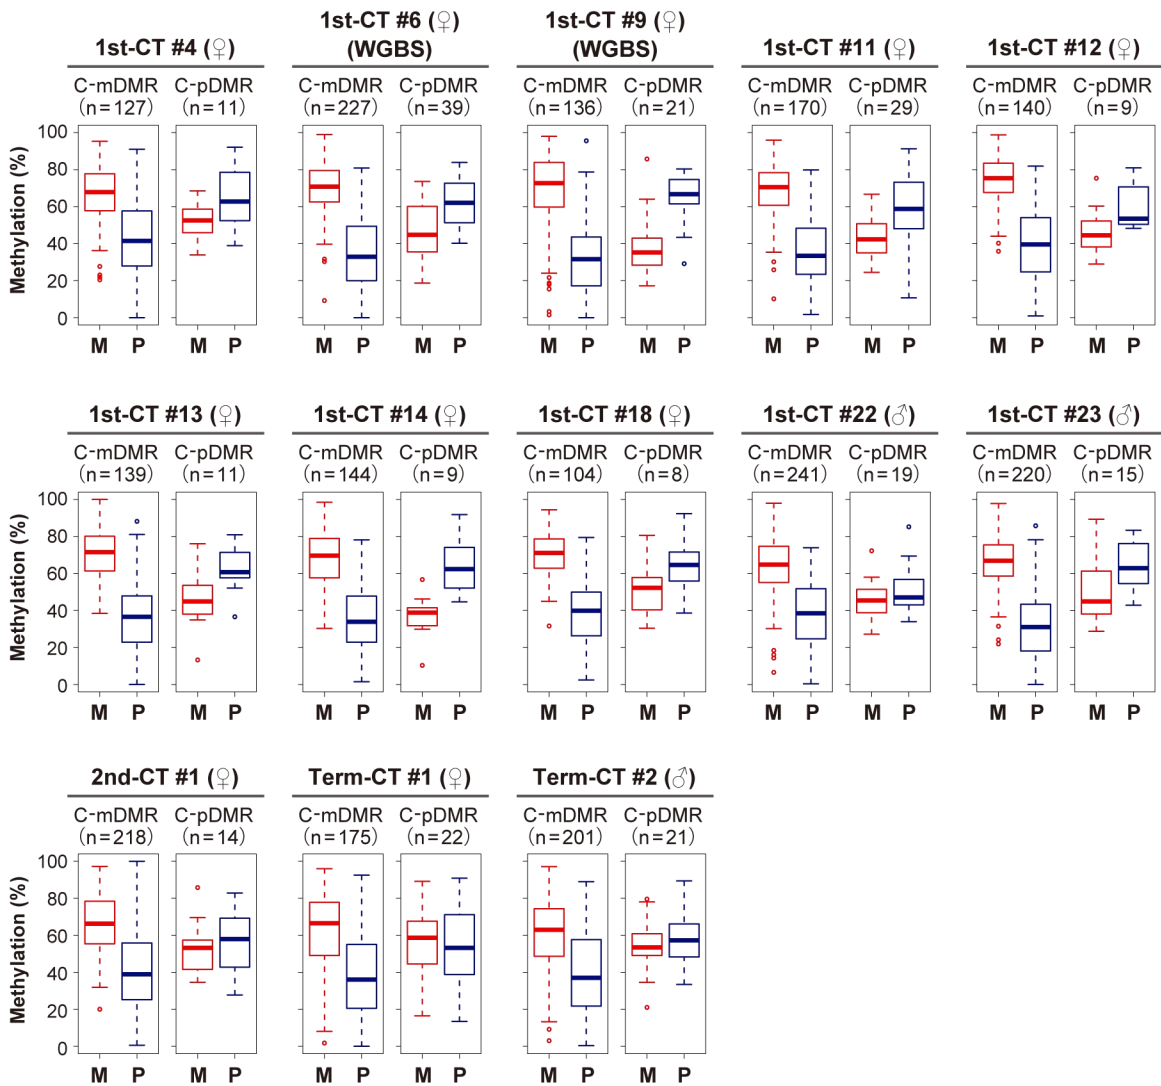

### **Figure S3. Allelic DNA methylation levels in each CT sample**

Box plots of methylation levels of the maternal (M) and paternal (P) alleles of candidate gDMRs. Boxes represent lower and upper quartiles and horizontal lines indicate the median. Whiskers extend to the most extreme data points within 1.5 times the interquartile range from the boxes. The open circles indicate the data points outside the whiskers. Ten female 1st-CT samples and three 2nd/term-CT samples were analyzed. 1st-CT #6 and #9 were analyzed using WGBS and the other samples were analyzed using targeted bisulfite sequencing.

**A**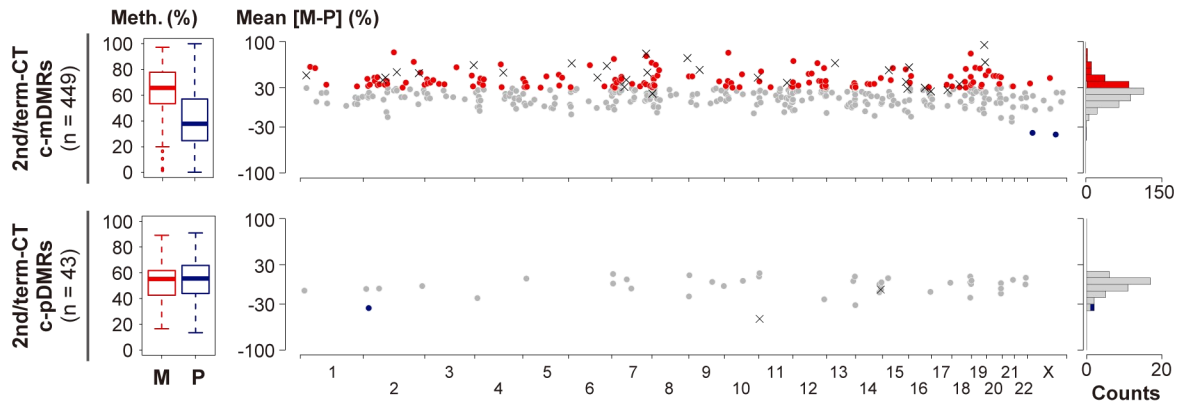**B**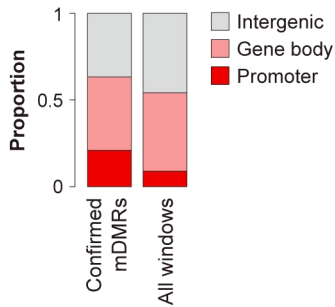**C**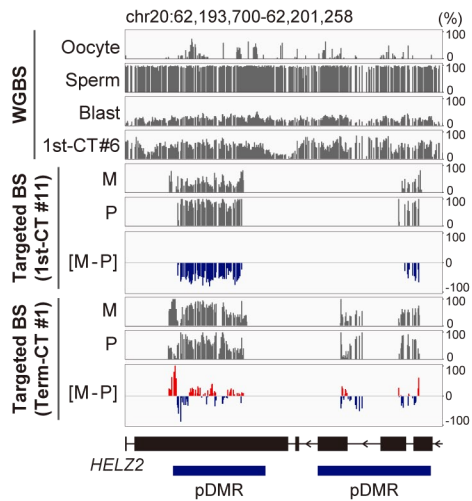

#### **Figure S4. Distribution of gDMRs in 2nd/term CT samples**

(A) Allelic DNA methylation patterns of candidate DMRs (c-DMRs) in 2nd/term-CT samples. Data from three placental samples were combined. Box plots of methylation levels of the maternal (M) and paternal (P) alleles, chromosomal distribution of [M-P] levels and histograms of the distribution of the [M-P] levels are shown. In the chromosome maps, red circles indicate c-DMRs showing  $\geq 30\%$  [M-P] levels and statistically significant allelic methylation differences (BH-corrected  $P < 0.05$ ). Similarly, blue circles indicate those with  $\leq -30\%$  [M-P] levels. The other c-DMRs are shown as gray circles. Cross marks ( $\times$ ) represent known gDMRs.

(B) Distribution of the confirmed mDMRs and all 20 CpG windows. Compared to the 20 CpG windows, the confirmed mDMRs were significantly enriched at promoter regions ( $P = 1.0 \times 10^{-15}$ ; Chi-square test).

(C) DNA methylation patterns of pDMRs located in the gene body region of *HELZ2* [MIM: 611265]. The pDMRs were paternally methylated in 1st-CT cells, but the paternally biased methylation was lost in term-CT cells.

**Motif**

***E*-value**

**% of targets**

**Similar motifs**

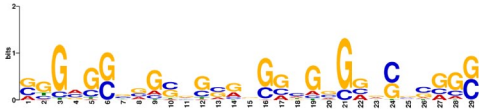

3.4e-88

36.8%

EGR1

SP2

SP1



### **Figure S5. Search for sequence motifs in the confirmed mDMRs**

We used MEME-ChIP<sup>2</sup> for the motif search. The confirmed mDMRs (n = 440) were analyzed. We considered only statistically significant ( $E$ -value < 0.05) motifs that were found in > 20% of the confirmed mDMRs. The three most similar motifs are also indicated.

**A**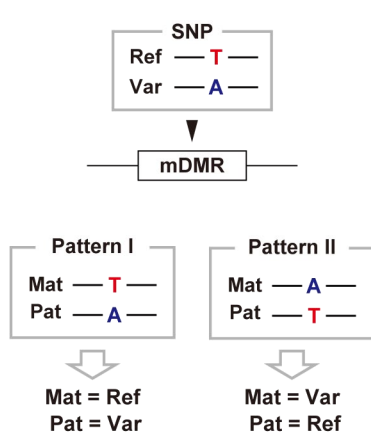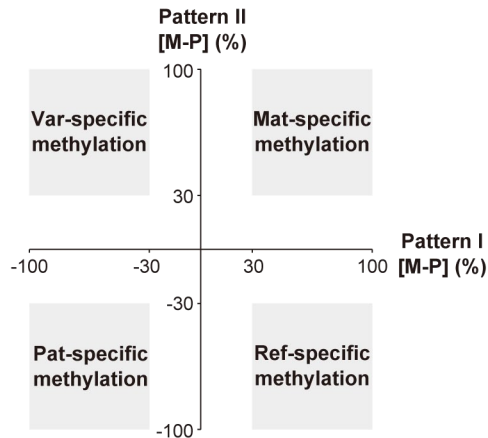**B**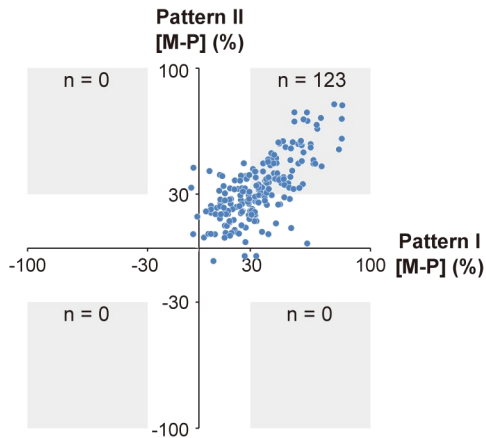

## **Figure S6. Haplotype-dependent allele-specific methylation (hap-ASM) analysis**

(A) Schematic representation of the hap-ASM analysis. For each mDMR, CT samples were classified into two groups according to the SNP sequences (exemplified by T/A). Samples whose maternal alleles are the reference alleles are classified as Pattern I, and those whose maternal alleles are the variant alleles are classified as Pattern II. Parent-of-origin-dependent allele-specific methylation (Mat- or Pat-specific methylation) and hap-ASM (Ref- or Var-specific methylation) can be distinguished by comparing the mean [M-P] levels of Pattern I and II samples. Ref: reference allele; Var: variant allele; Mat: maternal allele; Pat: paternal allele.

(B) Hap-ASM analysis of candidate mDMRs. The data of the 1st-CT samples were used. In our data set, 306 SNPs overlapping 149 candidate mDMRs (including those that were not confirmed to be imprinted) were available for the hap-ASM analysis. The numbers of SNPs associated with parent-of-origin-dependent allele-specific methylation and hap-ASM are indicated. 123 SNPs overlapping 65 candidate mDMRs were confirmed to be associated with parent-of-origin-dependent allele-specific methylation. No region was found to show hap-ASM.

[M-P] (%)

SD of [M-P] < 10

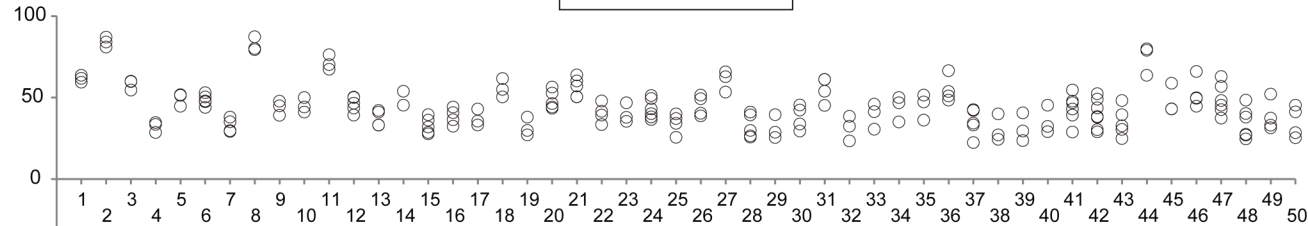

10 ≤ SD of [M-P] ≤ 15

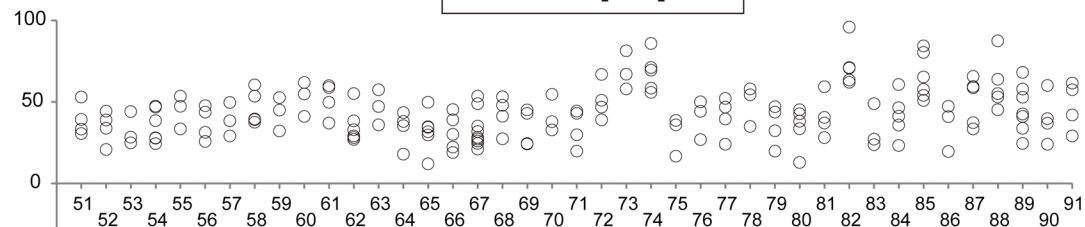

SD of [M-P] > 15

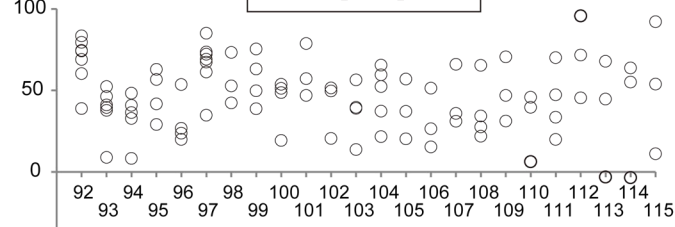

### **Figure S7. Variations in allelic methylation levels between samples**

Confirmed mDMRs for which there were data from three or more samples are shown.

The SD value for each confirmed mDMR was calculated as shown in Figure 2D, and

the confirmed mDMRs were numbered according to the SD values. Some confirmed

mDMRs with  $> 15\%$  SD values showed polymorphic imprinting (e.g. No. 113-115). In

contrast, the allelic methylation levels of mDMRs with  $< 10\%$  SD values (No. 1-50)

were relatively consistent across samples.

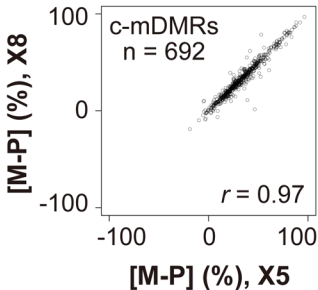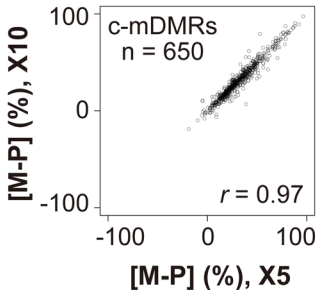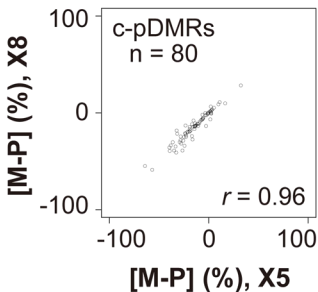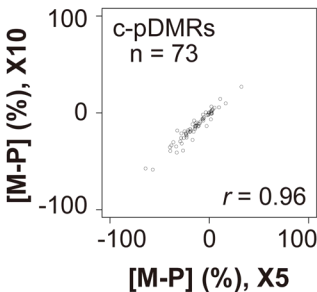

**Figure S8. Comparison of allelic methylation levels obtained at 5X, 8X and 10X**

**coverage**

Allelic methylation levels of candidate mDMRs were calculated using CpGs covered with  $\geq 5$  reads (5X),  $\geq 8$  reads (8X) and  $\geq 10$  reads (10X). The data of the 1st-CT samples were used. The 8X and 10 data highly correlated with the 5X data ( $r > 0.95$ ).

**A**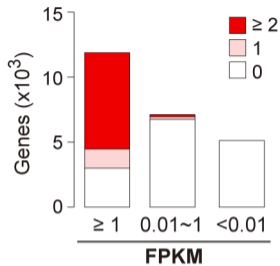**B**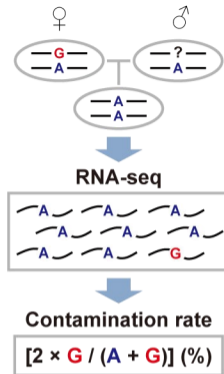**C**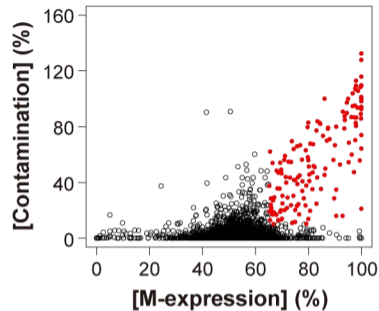**D**

| GO term               | Count | Corrected <i>P</i> -value |
|-----------------------|-------|---------------------------|
| inflammatory response | 21    | $6.6 \times 10^{-9}$      |
| response to wounding  | 26    | $9.1 \times 10^{-9}$      |
| immune response       | 28    | $2.8 \times 10^{-8}$      |



**Figure S9. Allelic expression analysis and identification of genes highly expressed in contaminating maternal cells**

(A) Counts of autosomal genes covered by our allelic expression analyses. We analyzed 21 1st-CT samples (Table S1). Genes covered by  $\geq 2$  samples are shown in red, genes covered by one sample are in thin red and uncovered genes are in white. ~75% of genes with  $\geq 1$  FPKM were successfully analyzed in at least one sample but most genes with  $< 1$  FPKM were not.

(B) Estimation of maternal cell contamination. We focused on SNPs that were homozygous in CT samples (exemplified by A/A) and heterozygous in mothers (exemplified by A/G). By doubling the rate of reads containing the non-embryonic SNP (“G” in this figure), we estimated the expression rate from the contaminating maternal cells ([Contamination] rate) for each gene.

(C) The relationship between the [M-expression] ratio and [Contamination] rate. Genes with  $> 10\%$  mean [Contamination] rates and  $> 65\%$  [M-expression] ratios are shown in red. Genes with  $> 10\%$  [Contamination] rates tended to show maternally biased expression.

**(D)** GO analysis of genes with  $> 10\%$  mean [Contamination] rates and  $> 65\%$  [M-expression] ratios ( $n = 154$ ). The top three GO terms are indicated with gene counts and BH-corrected  $P$ -values. Immune-related GO terms were significantly enriched.

**A**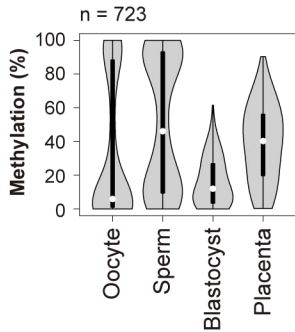**B**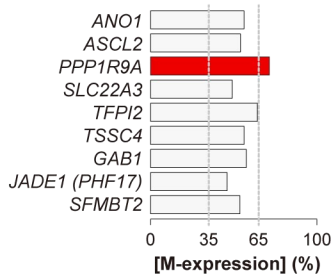**C**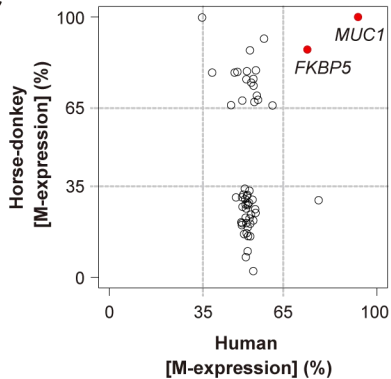

**Figure S10. Low conservation of gDMRs and imprinted genes in mammalian placentas**

(A) DNA methylation patterns of regions homologous to human candidate mDMRs in mouse oocytes, sperm, blastocysts and placenta. We used available WGBS data of mouse oocytes (DRA000570),<sup>3</sup> sperm, blastocysts (DRA000484)<sup>4</sup> and placenta (GSM1051161).<sup>5</sup> We selected regions having  $\geq 80\%$  methylation in oocytes,  $\leq 20\%$  methylation in sperm, 25-65% methylation with  $\leq 20\%$  SD in blastocysts and 30-70% methylation with  $\leq 20\%$  SD in the mouse placenta as candidate mDMRs. Only 5 regions were found to have the imprinted methylation patterns, suggesting that most human placental mDMRs may not be mDMRs in the mouse placenta.

(B) Allelic expression of human homologs of mouse placenta-specific imprinted genes. Mouse placenta-specific imprinted genes are from the Catalogue of Parental Origin Effects database. Only *PPP1R9A* showed maternal expression ( $> 65\%$  [M-expression] ratio) in human 1st-CT cells.

(C) Allelic expression of candidate imprinted genes ( $n = 78$ ) identified in the placenta of hybrids of the horse and donkey. The x-axis and y-axis show mean [M-expression] ratios in human 1st-CT cells and the placenta of the hybrids, respectively. These candidate imprinted genes did not have conserved imprinted expression patterns in the human placenta except for two genes, *MUC1* and *FKBP5*.

**Table S1. CT samples used for bisulfite sequencing and RNA sequencing**

The number of uniquely mapped reads and mean coverage per CpG site are shown.

**Table S2. Chromosomal location of candidate and known gDMRs**

Regions selected for the targeted bisulfite sequencing are indicated. Names of the known gDMRs are also indicated.

**Table S3. Allelic DNA methylation levels of candidate gDMRs in 1st-CT samples**

Ten 1st-CT samples were analyzed. For each gDMR, the methylation levels of the maternal (M) and paternal (P) alleles and the [M-P] level are shown. The candidate mDMRs and pDMRs were respectively ranked according to their [M-P] levels. The statistical significance (BH-corrected *P*-value) of the methylation differences between parental alleles is shown. Associated genes are also indicated. All informative candidate gDMRs including those that were not confirmed to be imprinted are indicated. NA: Not available.

**Table S4. Allelic DNA methylation levels of candidate gDMRs in 2nd/term-CT samples**

Three 2nd/term-CT samples were analyzed. For each gDMR, the methylation levels of the maternal (M) and paternal (P) alleles and the [M-P] level are shown. The candidate mDMRs and pDMRs were respectively ranked according to their [M-P] levels. The statistical significance (BH-corrected *P*-value) of the methylation differences between parental alleles is shown. Associated genes are also indicated. All informative candidate gDMRs including those that were not confirmed to be imprinted are indicated. NA: Not available.

**Table S5. Allelic DNA methylation levels of known gDMRs in 1st-CT samples**

Known gDMRs are classified as described in Materials and Methods. For each gDMR, the methylation levels of the maternal (M) and paternal (P) alleles and the [M-P] level are shown. The statistical significance (BH-corrected *P*-value) of the methylation differences between parental alleles is also indicated. NA: Not available.

**Table S6. Allelic DNA methylation levels of known gDMRs in 2nd/term-CT samples**

Known gDMRs are classified as described in Materials and Methods. For each gDMR, the methylation levels of the maternal (M) and paternal (P) alleles and the [M-P] level are shown. The statistical significance (BH-corrected *P*-value) of the methylation differences between parental alleles is also indicated. NA: Not available.

**Table S7. Allelic expression of autosomal genes**

For each gene, the proportion of reads derived from the maternal allele to total reads ([M-expression] ratio), [Contamination] rate and FPKM are shown. The statistical significance (BH-corrected *P*-value) of the allelic expression differences is also shown. NA: Not available.

**Table S8. Strong candidate imprinted genes**

For each gene, the mean [M-expression] ratio, BH-corrected *P*-value and expression allele are shown. The numbers of samples with maternal (< 35% [M-expression] ratios),

paternal (> 65% [M-expression] ratios) and biallelic (35-65% [M-expression] ratios) expression are also indicated. Allelic DNA methylation patterns of associated gDMRs, which were obtained using the 1st-CT samples, are also included. Maternal methylation of the *CYP2J2* DMR was previously reported.<sup>6</sup> NA: Not available; M: maternal; P: paternal.

**Table S9. Allelic expression of X-linked genes**

For each gene, the [M-expression] ratio, [Contamination] rate and FPKM are shown.

Genes in the pseudoautosomal regions are also indicated. NA: Not available.



## References

1. Hanna, C.W., Penaherrera, M.S., Saadeh, H., Andrews, S., McFadden, D.E., Kelsey, G., and Robinson, W.P. (2016). Pervasive polymorphic imprinted methylation in the human placenta. *Genome Res.*
2. Machanick, P., and Bailey, T.L. (2011). MEME-ChIP: motif analysis of large DNA datasets. *Bioinformatics* 27, 1696-1697.
3. Shirane, K., Toh, H., Kobayashi, H., Miura, F., Chiba, H., Ito, T., Kono, T., and Sasaki, H. (2013). Mouse oocyte methylomes at base resolution reveal genome-wide accumulation of non-CpG methylation and role of DNA methyltransferases. *PLoS Genet* 9, e1003439.
4. Kobayashi, H., Sakurai, T., Imai, M., Takahashi, N., Fukuda, A., Yayoi, O., Sato, S., Nakabayashi, K., Hata, K., Sotomaru, Y., et al. (2012). Contribution of intragenic DNA methylation in mouse gametic DNA methylomes to establish oocyte-specific heritable marks. *PLoS Genet* 8, e1002440.
5. Hon, G.C., Rajagopal, N., Shen, Y., McCleary, D.F., Yue, F., Dang, M.D., and Ren, B. (2013). Epigenetic memory at embryonic enhancers identified in DNA methylation maps from adult mouse tissues. *Nat Genet* 45, 1198-1206.
6. Sanchez-Delgado, M., Martin-Trujillo, A., Tayama, C., Vidal, E., Esteller, M., Iglesias-Platas, I., Deo, N., Barney, O., Maclean, K., Hata, K., et al. (2015). Absence of Maternal Methylation in Biparental Hydatidiform Moles from Women with NLRP7 Maternal-Effect Mutations Reveals Widespread Placenta-Specific Imprinting. *PLoS Genet* 11, e1005644.
